# Supplementary material
Source: PubMed Central journal article supplement (PMC6918823)

## **Supplementary Tables and Figures:**

**Supplemental Table 1:** List of variants, including of known and unknown significance, from mutational profiling studies.

**Supplemental Table 2:** Comparison of patients and transplant characteristics in patients who had a myeloablative conditioning regimen and those who had a reduced intensity conditioning regimen.

**Supplemental Table 3:** Summary of factors that were found to be associated with non-relapse mortality in a univariate analysis.

**Supplemental Table 4:** Univariate analysis of impact on relapse-free survival of clinical characteristics and mutations.

**Supplemental Table 5:** Analysis of chimerism and *JAK2V617F* mutation in serial samples of 4 patients who relapsed post-transplant.

**Supplemental Figure 1: Kaplan-Meier curves for Relapse Free Survival (RFS) by conditioning intensity, mutations and cytogenetic abnormalities.** RFS (A) compared between myeloablative conditioning (MAC) and reduced intensity conditioning (RIC), (B) Presence or absence of high molecular risk (HMR) mutations (C) Related and unrelated donors (D) Presence or absence of *DNMT3A* (E) Presence or absence of *U2AF1* or *DNMT3A* (F) The combined effect of conditioning intensity and presence or absence of *U2AF1* and

**Supplemental Figure 2:** Multivariate analysis for relapse free survival shown by forest plot.

# Supplemental Table 1

| Chromosome | Start position | Ref allele               | Alt allele | Sample               | VAF   | Depth | Gene        | Protein change | Effect               | Annotation |
|------------|----------------|--------------------------|------------|----------------------|-------|-------|-------------|----------------|----------------------|------------|
| 9          | 5073770        | G                        | T          | E-H-108024-T1-1-D1-1 | 0.45  |       | 981JAK2     | p.V617F        | non_synonymous_codon | ONCOGENIC  |
| 6          | 152265352      | C                        | T          | E-H-108024-T1-1-D1-1 | 0.48  |       | 827ESR1     | p.R269C        | non_synonymous_codon | UNKNOWN    |
| 12         | 49434504       | T                        | C          | E-H-108024-T1-1-D1-1 | 0.49  |       | 692KMT2D    | p.Q2350R       | non_synonymous_codon | UNKNOWN    |
| 2          | 242065738      | C                        | A          | E-H-108024-T1-1-D1-1 | 0.5   |       | 839PASK     | p.E864D        | non_synonymous_codon | UNKNOWN    |
| 1          | 243663047      | A                        | AT         | E-H-108024-T1-1-D1-1 | 0.387 |       | 1185AKT3    | p.*466fs*22    | frameshift_variant   | UNKNOWN    |
| 2          | 25469624       | T                        | TC         | E-H-108024-T1-1-D1-1 | 0.404 |       | 1087DNMT3A  | p.K382fs*11    | frameshift_variant   | LIKELY     |
| 9          | 5073770        | G                        | T          | E-H-108024-T2-1-D1-1 | 0.55  |       | 1229JAK2    | p.V617F        | non_synonymous_codon | ONCOGENIC  |
| 6          | 152265352      | C                        | T          | E-H-108024-T2-1-D1-1 | 0.47  |       | 869ESR1     | p.R269C        | non_synonymous_codon | UNKNOWN    |
| 12         | 49434504       | T                        | C          | E-H-108024-T2-1-D1-1 | 0.5   |       | 640KMT2D    | p.Q2350R       | non_synonymous_codon | UNKNOWN    |
| 2          | 242065738      | C                        | A          | E-H-108024-T2-1-D1-1 | 0.48  |       | 786PASK     | p.E864D        | non_synonymous_codon | UNKNOWN    |
| 1          | 243663047      | A                        | AT         | E-H-108024-T2-1-D1-1 | 0.378 |       | 1093AKT3    | p.*466fs*22    | frameshift_variant   | UNKNOWN    |
| 2          | 25469624       | T                        | TC         | E-H-108024-T2-1-D1-1 | 0.414 |       | 982DNMT3A   | p.K382fs*11    | frameshift_variant   | LIKELY     |
| 9          | 5073770        | G                        | T          | E-H-108025-T1-1-D1-1 | 0.77  |       | 1078JAK2    | p.V617F        | non_synonymous_codon | ONCOGENIC  |
| 20         | 57484421       | G                        | A          | E-H-108025-T1-1-D1-1 | 0.1   |       | 1934GNAS    | p.R202H        | non_synonymous_codon | ONCOGENIC  |
| 1          | 43818306       | T                        | A          | E-H-108025-T1-1-D1-1 | 0.57  |       | 2027MPL     | p.Y591N        | non_synonymous_codon | LIKELY     |
| 1          | 45797950       | T                        | C          | E-H-108025-T1-1-D1-1 | 0.64  |       | 1840MUTYH   | p.R271Q        | non_synonymous_codon | UNKNOWN    |
| 11         | 69589593       | T                        | C          | E-H-108025-T1-1-D1-1 | 0.38  |       | 480FGF4     | p.Y87C         | non_synonymous_codon | UNKNOWN    |
| 1          | 78432377       | C                        | A          | E-H-108025-T1-1-D1-1 | 0.35  |       | 1855FUBP1   | p.?            | splice_site_variant  | UNKNOWN    |
| 11         | 94192599       | G                        | T          | E-H-108025-T1-1-D1-1 | 0.45  |       | 1658MRE11A  | p.A492D        | non_synonymous_codon | UNKNOWN    |
| 2          | 240056036      | G                        | A          | E-H-108025-T1-1-D1-1 | 0.49  |       | 1824HDAC4   | p.S400L        | non_synonymous_codon | UNKNOWN    |
| 1          | 36937057       | A                        | G          | E-H-108025-T1-1-D1-1 | 0.61  |       | 782CSF3R    | p.P421L        | non_synonymous_codon | UNKNOWN    |
| 9          | 5073770        | G                        | T          | E-H-108025-T2-1-D1-1 | 0.84  |       | 844JAK2     | p.V617F        | non_synonymous_codon | ONCOGENIC  |
| 20         | 57484421       | G                        | A          | E-H-108025-T2-1-D1-1 | 0.17  |       | 1530GNAS    | p.R202H        | non_synonymous_codon | ONCOGENIC  |
| 1          | 43818306       | T                        | A          | E-H-108025-T2-1-D1-1 | 0.55  |       | 1555MPL     | p.Y591N        | non_synonymous_codon | LIKELY     |
| 19         | 7132173        | G                        | C          | E-H-108025-T2-1-D1-1 | 0.46  |       | 809INSR     | p.D946E        | non_synonymous_codon | UNKNOWN    |
| 1          | 45797950       | C                        | T          | E-H-108025-T2-1-D1-1 | 0.62  |       | 1441MUTYH   | p.R271Q        | non_synonymous_codon | UNKNOWN    |
| 11         | 69589593       | T                        | C          | E-H-108025-T2-1-D1-1 | 0.41  |       | 431FGF4     | p.Y87C         | non_synonymous_codon | UNKNOWN    |
| 1          | 78432377       | C                        | A          | E-H-108025-T2-1-D1-1 | 0.42  |       | 1558FUBP1   | p.?            | splice_site_variant  | UNKNOWN    |
| 11         | 94192599       | G                        | T          | E-H-108025-T2-1-D1-1 | 0.46  |       | 1316MRE11A  | p.A492D        | non_synonymous_codon | UNKNOWN    |
| 2          | 240056036      | G                        | A          | E-H-108025-T2-1-D1-1 | 0.5   |       | 1377HDAC4   | p.S400L        | non_synonymous_codon | UNKNOWN    |
| 1          | 36937057       | G                        | A          | E-H-108025-T2-1-D1-1 | 0.55  |       | 626CSF3R    | p.P421L        | non_synonymous_codon | UNKNOWN    |
| 9          | 5073770        | G                        | T          | E-H-108026-T1-1-D1-1 | 0.17  |       | 1134JAK2    | p.V617F        | non_synonymous_codon | ONCOGENIC  |
| 2          | 141812795      | G                        | T          | E-H-108026-T1-1-D1-1 | 0.48  |       | 812LRP1B    | p.G481E        | non_synonymous_codon | UNKNOWN    |
| 16         | 70285799       | G                        | A          | E-H-108026-T1-1-D1-1 | 0.46  |       | 1061EXOSC6  | p.P2L          | non_synonymous_codon | UNKNOWN    |
| 19         | 1226555        | C                        | T          | E-H-108026-T1-1-D1-1 | 0.49  |       | 1077STK11   | p.S404F        | non_synonymous_codon | UNKNOWN    |
| 2          | 242065761      | C                        | T          | E-H-108026-T1-1-D1-1 | 0.49  |       | 1058PASK    | p.D857N        | non_synonymous_codon | UNKNOWN    |
| 21         | 36206711       | G                        | T          | E-H-108026-T1-1-D1-1 | 0.42  |       | 895RUNX1    | p.M267I        | non_synonymous_codon | ONCOGENIC  |
| 9          | 5073770        | C                        | T          | E-H-108026-T2-1-D1-1 | 0.27  |       | 1043JAK2    | p.V617F        | non_synonymous_codon | ONCOGENIC  |
| 2          | 141812795      | C                        | T          | E-H-108026-T2-1-D1-1 | 0.49  |       | 828LRP1B    | p.G481E        | non_synonymous_codon | UNKNOWN    |
| 16         | 70285799       | G                        | A          | E-H-108026-T2-1-D1-1 | 0.47  |       | 1027EXOSC6  | p.P2L          | non_synonymous_codon | UNKNOWN    |
| 19         | 1226555        | C                        | T          | E-H-108026-T2-1-D1-1 | 0.47  |       | 1024STK11   | p.S404F        | non_synonymous_codon | UNKNOWN    |
| 2          | 242065761      | C                        | T          | E-H-108026-T2-1-D1-1 | 0.5   |       | 1057PASK    | p.D857N        | non_synonymous_codon | UNKNOWN    |
| 21         | 36206711       | C                        | T          | E-H-108026-T2-1-D1-1 | 0.44  |       | 805RUNX1    | p.M267I        | non_synonymous_codon | ONCOGENIC  |
| 9          | 135772998      | CTG                      | C          | E-H-108026-T2-1-D1-1 | 0.07  |       | 646TSC1     | p.?            | splice_site_variant  | UNKNOWN    |
| 7          | 148515136      | C                        | T          | E-H-108027-T1-1-D1-1 | 0.47  |       | 1716EZH2    | p.R358H        | non_synonymous_codon | UNKNOWN    |
| 12         | 18552594       | C                        | T          | E-H-108027-T1-1-D1-1 | 0.45  |       | 968PIK3C2G  | p.L669F        | non_synonymous_codon | UNKNOWN    |
| 12         | 49425575       | C                        | T          | E-H-108027-T1-1-D1-1 | 0.48  |       | 1294KMT2D   | p.V4305I       | non_synonymous_codon | UNKNOWN    |
| 7          | 151927058      | C                        | T          | E-H-108027-T1-1-D1-1 | 0.072 |       | 1838KMT2C   | p.A976T        | non_synonymous_codon | UNKNOWN    |
| 20         | 31022402       | TCACCACTGCCATAGAGAGCGCGC | T          | E-H-108027-T1-1-D1-1 | 0.014 |       | 350ASXL1    | p.E635fs*15    | frameshift_variant   | LIKELY     |
| 6          | 157099423      | GCAA                     | G          | E-H-108027-T1-1-D1-1 | 0.055 |       | 330ARID1B   | p.Q131delQ     | inframe_codon_loss   | UNKNOWN    |
| 7          | 148515136      | C                        | T          | E-H-108027-T2-1-D1-1 | 0.47  |       | 1612EZH2    | p.R358H        | non_synonymous_codon | UNKNOWN    |
| 12         | 18552594       | C                        | T          | E-H-108027-T2-1-D1-1 | 0.44  |       | 819PIK3C2G  | p.L669F        | non_synonymous_codon | UNKNOWN    |
| 12         | 49425575       | C                        | T          | E-H-108027-T2-1-D1-1 | 0.47  |       | 1098KMT2D   | p.V4305I       | non_synonymous_codon | UNKNOWN    |
| 7          | 151927058      | C                        | T          | E-H-108027-T2-1-D1-1 | 0.066 |       | 1792KMT2C   | p.A976T        | non_synonymous_codon | UNKNOWN    |
| 20         | 31022402       | TCACCACTGCCATAGAGAGCGCGC | T          | E-H-108027-T2-1-D1-1 | 0.02  |       | 303ASXL1    | p.E635fs*15    | frameshift_variant   | LIKELY     |
| 6          | 157099423      | GCAA                     | G          | E-H-108027-T2-1-D1-1 | 0.054 |       | 276ARID1B   | p.Q131delQ     | inframe_codon_loss   | UNKNOWN    |
| 2          | 240011722      | C                        | T          | E-H-108028-T1-1-D1-1 | 0.49  |       | 1875HDAC4   | p.A786T        | non_synonymous_codon | UNKNOWN    |
| 18         | 10471956       | C                        | A          | E-H-108028-T1-1-D1-1 | 0.51  |       | 1297APCDD1  | p.D224E        | non_synonymous_codon | UNKNOWN    |
| 6          | 37138771       | C                        | A          | E-H-108028-T1-1-D1-1 | 0.47  |       | 1136PIM1    | p.H680         | non_synonymous_codon | UNKNOWN    |
| 1          | 162725036      | A                        | T          | E-H-108028-T1-1-D1-1 | 0.5   |       | 1266DDR2    | p.T170S        | non_synonymous_codon | UNKNOWN    |
| 17         | 63049685       | T                        | C          | E-H-108028-T1-1-D1-1 | 0.5   |       | 1022GNA13   | p.I149V        | non_synonymous_codon | UNKNOWN    |
| 5          | 35876524       | C                        | G          | E-H-108028-T1-1-D1-1 | 0.48  |       | 1257IL7R    | p.T439S        | non_synonymous_codon | UNKNOWN    |
| 12         | 438005         | T                        | A          | E-H-108028-T1-1-D1-1 | 0.47  |       | 1034KDM5A   | p.Q855L        | non_synonymous_codon | UNKNOWN    |
| 3          | 185191118      | G                        | A          | E-H-108028-T1-1-D1-1 | 0.49  |       | 1316MAP3K13 | p.A667T        | non_synonymous_codon | UNKNOWN    |
| 4          | 55955553       | G                        | A          | E-H-108029-T1-1-D1-1 | 0.46  |       | 1775KDR     | p.T1131I       | non_synonymous_codon | UNKNOWN    |
| 17         | 70119966       | G                        | C          | E-H-108029-T1-1-D1-1 | 0.5   |       | 822SOX9     | p.S323T        | non_synonymous_codon | UNKNOWN    |
| X          | 76938680       | T                        | G          | E-H-108029-T1-1-D1-1 | 0.48  |       | 1635ATRX    | p.K690Q        | non_synonymous_codon | UNKNOWN    |
| 16         | 87393935       | C                        | G          | E-H-108029-T1-1-D1-1 | 0.44  |       | 1178FBXO31  | p.I126M        | non_synonymous_codon | UNKNOWN    |
| 7          | 151845975      | C                        | T          | E-H-108029-T1-1-D1-1 | 0.49  |       | 1202KMT2C   | p.R4346K       | non_synonymous_codon | UNKNOWN    |
| 8          | 37690649       | G                        | A          | E-H-108029-T1-1-D1-1 | 0.5   |       | 1632GPR124  | p.G407S        | non_synonymous_codon | UNKNOWN    |
| 1          | 46725738       | C                        | T          | E-H-108029-T1-1-D1-1 | 0.5   |       | 996RAD54L   | p.P125L        | non_synonymous_codon | UNKNOWN    |
| 16         | 2988272        | C                        | T          | E-H-108029-T1-1-D1-1 | 0.49  |       | 1294FLYWCH1 | p.A621V        | non_synonymous_codon | UNKNOWN    |
| 22         | 41537193       | A                        | G          | E-H-108029-T1-1-D1-1 | 0.48  |       | 1245EP300   | p.N674D        | non_synonymous_codon | UNKNOWN    |
| 19         | 42384773       | G                        | A          | E-H-108029-T1-1-D1-1 | 0.48  |       | 963CD79A    | p.G179R        | non_synonymous_codon | UNKNOWN    |

|    |           |                                                  |                                              |                      |       |              |                              |                      |           |
|----|-----------|--------------------------------------------------|----------------------------------------------|----------------------|-------|--------------|------------------------------|----------------------|-----------|
| 19 | 13054564  | AGCAGAGGCTTAAGGAGGAGGAAGAACAGAAACGAAAAGAGGAGGAGG | A                                            | E-H-108029-T1-1-D1-1 | 0.073 | 890CALR      | p.L367fs*46                  | frameshift_variant   | ONCOGENIC |
| 12 | 121880447 | CCTT                                             | C                                            | E-H-108029-T1-1-D1-1 | 0.378 | 2307KDM2B    | p.K932delK                   | inframe_codon_loss   | UNKNOWN   |
| 14 | 102551254 | C                                                | CTTCTTT                                      | E-H-108029-T1-1-D1-1 | 0.211 | 2353HSP90AA1 | p.E370_E371insKE             | inframe_codon_gain   | UNKNOWN   |
| 4  | 187557962 | T                                                | C                                            | E-H-108029-T2-1-D1-1 | 0.46  | 934FAT1      | p.Y1250C                     | non_synonymous_codon | UNKNOWN   |
| 4  | 55955553  | G                                                | A                                            | E-H-108029-T2-1-D1-1 | 0.44  | 1457KDR      | p.T1131I                     | non_synonymous_codon | UNKNOWN   |
| 17 | 70119966  | G                                                | C                                            | E-H-108029-T2-1-D1-1 | 0.49  | 564SOX9      | p.S323T                      | non_synonymous_codon | UNKNOWN   |
| X  | 76938680  | T                                                | G                                            | E-H-108029-T2-1-D1-1 | 0.47  | 1301ATRX     | p.K690Q                      | non_synonymous_codon | UNKNOWN   |
| 16 | 87393935  | G                                                | C                                            | E-H-108029-T2-1-D1-1 | 0.47  | 959FBXO31    | p.I126M                      | non_synonymous_codon | UNKNOWN   |
| 7  | 151845975 | C                                                | T                                            | E-H-108029-T2-1-D1-1 | 0.47  | 988KMT2C     | p.R4346K                     | non_synonymous_codon | UNKNOWN   |
| 8  | 37690649  | G                                                | A                                            | E-H-108029-T2-1-D1-1 | 0.48  | 1332GPR124   | p.G407S                      | non_synonymous_codon | UNKNOWN   |
| 1  | 46725738  | C                                                | T                                            | E-H-108029-T2-1-D1-1 | 0.48  | 860RAD54L    | p.P125L                      | non_synonymous_codon | UNKNOWN   |
| 22 | 41537193  | A                                                | G                                            | E-H-108029-T2-1-D1-1 | 0.47  | 1071EP300    | p.N674D                      | non_synonymous_codon | UNKNOWN   |
| 19 | 42384773  | G                                                | A                                            | E-H-108029-T2-1-D1-1 | 0.42  | 790CD79A     | p.G179R                      | non_synonymous_codon | UNKNOWN   |
| 19 | 13054564  | AGCAGAGGCTTAAGGAGGAGGAAGAACAGAAACGAAAAGAGGAGGAGG | A                                            | E-H-108029-T2-1-D1-1 | 0.089 | 762CALR      | p.L367fs*46                  | frameshift_variant   | ONCOGENIC |
| 12 | 121880447 | CCTT                                             | C                                            | E-H-108029-T2-1-D1-1 | 0.389 | 1791KDM2B    | p.K932delK                   | inframe_codon_loss   | UNKNOWN   |
| 14 | 102551254 | C                                                | CTTCTTT                                      | E-H-108029-T2-1-D1-1 | 0.213 | 1833HSP90AA1 | p.E370_E371insKE             | inframe_codon_gain   | UNKNOWN   |
| 21 | 44514777  | T                                                | G                                            | E-H-108030-T1-1-D1-1 | 0.34  | 1065UZAF1    | p.Q157P                      | non_synonymous_codon | ONCOGENIC |
| 15 | 90631934  | C                                                | T                                            | E-H-108030-T1-1-D1-1 | 0.32  | 1378IDH2     | p.R140Q                      | non_synonymous_codon | ONCOGENIC |
| 6  | 94120273  | T                                                | C                                            | E-H-108030-T1-1-D1-1 | 0.47  | 1092EPAH7    | p.I260V                      | non_synonymous_codon | UNKNOWN   |
| 9  | 5073770   | G                                                | T                                            | E-H-108031-T1-1-D1-1 | 0.16  | 927JAK2      | p.V617F                      | non_synonymous_codon | ONCOGENIC |
| 7  | 151970858 | C                                                | T                                            | E-H-108031-T1-1-D1-1 | 0.05  | 476KMT2C     | p.G315D                      | non_synonymous_codon | LIKELY    |
| 13 | 25072339  | A                                                | C                                            | E-H-108031-T1-1-D1-1 | 0.48  | 1514PARP4    | p.V169G                      | non_synonymous_codon | UNKNOWN   |
| 12 | 46124998  | A                                                | G                                            | E-H-108031-T1-1-D1-1 | 0.39  | 1049ARID2    | p.?                          | splice_site_variant  | UNKNOWN   |
| 7  | 80292448  | C                                                | T                                            | E-H-108031-T1-1-D1-1 | 0.46  | 1483CD36     | p.P191L                      | non_synonymous_codon | UNKNOWN   |
| 7  | 128851596 | G                                                | T                                            | E-H-108031-T1-1-D1-1 | 0.47  | 890SMO       | p.P641A                      | non_synonymous_codon | UNKNOWN   |
| 2  | 27462578  | C                                                | T                                            | E-H-108031-T1-1-D1-1 | 0.48  | 1065CAD      | p.P1803L                     | non_synonymous_codon | UNKNOWN   |
| 13 | 28808521  | T                                                | G                                            | E-H-108031-T1-1-D1-1 | 0.49  | 1048FLT3     | p.N541H                      | non_synonymous_codon | UNKNOWN   |
| 22 | 41513763  | C                                                | C                                            | E-H-108031-T1-1-D1-1 | 0.5   | 834EP300     | p.L223V                      | non_synonymous_codon | UNKNOWN   |
| 17 | 74732935  | CGGCGGCTGTGGTGTGAGTCCGGGG                        | C                                            | E-H-108031-T1-1-D1-1 | 0.262 | 432SRSF2     | p.P95_R102delIPDSSHRSR       | inframe_codon_loss   | ONCOGENIC |
| 14 | 36986875  | T                                                | TGCCCCCGCC                                   | E-H-108031-T1-1-D1-1 | 0.099 | 964NXX2-1    | p.G271_T272insGGG            | inframe_codon_gain   | UNKNOWN   |
| 20 | 31021271  | CTG                                              | C                                            | E-H-108031-T1-1-D1-1 | 0.366 | 945ASXL1     | p.Y425fs*12                  | frameshift_variant   | LIKELY    |
| 9  | 5073770   | G                                                | T                                            | E-H-108031-T2-1-D1-1 | 0.094 | 892JAK2      | p.V617F                      | non_synonymous_codon | ONCOGENIC |
| 7  | 151970858 | C                                                | T                                            | E-H-108031-T2-1-D1-1 | 0.065 | 429KMT2C     | p.G315D                      | non_synonymous_codon | LIKELY    |
| 13 | 25072339  | A                                                | C                                            | E-H-108031-T2-1-D1-1 | 0.46  | 1352PARP4    | p.V169G                      | non_synonymous_codon | UNKNOWN   |
| 12 | 46124998  | A                                                | G                                            | E-H-108031-T2-1-D1-1 | 0.32  | 977ARID2     | p.?                          | splice_site_variant  | UNKNOWN   |
| 7  | 80292448  | C                                                | T                                            | E-H-108031-T2-1-D1-1 | 0.47  | 1342CD36     | p.P191L                      | non_synonymous_codon | UNKNOWN   |
| 7  | 128851596 | G                                                | T                                            | E-H-108031-T2-1-D1-1 | 0.48  | 855SMO       | p.P641A                      | non_synonymous_codon | UNKNOWN   |
| 2  | 27462578  | C                                                | T                                            | E-H-108031-T2-1-D1-1 | 0.5   | 950CAD       | p.P1803L                     | non_synonymous_codon | UNKNOWN   |
| 22 | 41513763  | C                                                | G                                            | E-H-108031-T2-1-D1-1 | 0.46  | 724EP300     | p.L223V                      | non_synonymous_codon | UNKNOWN   |
| 9  | 87635170  | T                                                | G                                            | E-H-108031-T2-1-D1-1 | 0.11  | 558NTRK2     | p.I741S                      | non_synonymous_codon | UNKNOWN   |
| 9  | 135772998 | CTG                                              | C                                            | E-H-108031-T2-1-D1-1 | 0.086 | 476TSC1      | p.?                          | splice_site_variant  | UNKNOWN   |
| 17 | 74732935  | CGGCGGCTGTGGTGTGAGTCCGGGG                        | C                                            | E-H-108031-T2-1-D1-1 | 0.243 | 419SRSF2     | p.P95_R102delIPDSSHRSR       | inframe_codon_loss   | ONCOGENIC |
| 14 | 36986875  | T                                                | TGCCCCCGCC                                   | E-H-108031-T2-1-D1-1 | 0.1   | 902NXX2-1    | p.G271_T272insGGG            | inframe_codon_gain   | UNKNOWN   |
| 20 | 31021271  | CTG                                              | C                                            | E-H-108031-T2-1-D1-1 | 0.328 | 862ASXL1     | p.Y425fs*12                  | frameshift_variant   | LIKELY    |
| 12 | 133263886 | C                                                | G                                            | E-H-108032-T1-1-D1-1 | 0.48  | 460POLE      | p.G6R                        | non_synonymous_codon | UNKNOWN   |
| 2  | 25050456  | G                                                | A                                            | E-H-108032-T1-1-D1-1 | 0.47  | 946DNMT3A    | p.P101L                      | non_synonymous_codon | UNKNOWN   |
| 2  | 25468174  | T                                                | C                                            | E-H-108032-T1-1-D1-1 | 0.47  | 762DNMT3A    | p.N501S                      | non_synonymous_codon | UNKNOWN   |
| 2  | 202123028 | C                                                | G                                            | E-H-108032-T1-1-D1-1 | 0.51  | 1038CASP8    | p.P25R                       | non_synonymous_codon | UNKNOWN   |
| 8  | 37555584  | T                                                | TGCGCACCTCGGCGGCTCCAGCTGCTCCACCTGCAGCGCGCCGA | E-H-108032-T1-1-D1-1 | 0.119 | 2056ZNF703   | p.A401_H402insFTHLGGSSCSTCSA | inframe_codon_gain   | UNKNOWN   |
| 2  | 192011484 | CT                                               | C                                            | E-H-108032-T1-1-D1-1 | 0.11  | 934STAT4     | p.?                          | splice_site_variant  | UNKNOWN   |
| 17 | 7578238   | TC                                               | C                                            | E-H-108032-T1-1-D1-1 | 0.321 | 1314TP53     | p.E204fs*43                  | frameshift_variant   | LIKELY    |
| 2  | 58386928  | G                                                | GTAAT                                        | E-H-108032-T1-1-D1-1 | 0.345 | 1715FANCL    | p.T367fs*13                  | frameshift_variant   | UNKNOWN   |
| 7  | 8018305   | CAGTTA                                           | C                                            | E-H-108032-T1-1-D1-1 | 0.223 | 1505PMS2     | p.L731fs*3                   | frameshift_variant   | UNKNOWN   |
| 12 | 133263886 | C                                                | G                                            | E-H-108032-T2-1-D1-1 | 0.079 | 76POLE       | p.G6R                        | non_synonymous_codon | UNKNOWN   |
| X  | 53222633  | G                                                | A                                            | E-H-108032-T2-1-D1-1 | 0.46  | 153KDM5C     | p.R1435C                     | non_synonymous_codon | UNKNOWN   |
| 22 | 46704656  | C                                                | T                                            | E-H-108032-T2-1-D1-1 | 0.52  | 130GTSE1     | p.S193F                      | non_synonymous_codon | UNKNOWN   |
| 5  | 149452916 | C                                                | T                                            | E-H-108032-T2-1-D1-1 | 0.49  | 233CSF1R     | p.D344N                      | non_synonymous_codon | UNKNOWN   |
| 11 | 22646984  | C                                                | T                                            | E-H-108032-T2-1-D1-1 | 0.44  | 129FANCF     | p.D125N                      | non_synonymous_codon | UNKNOWN   |
| 8  | 38282064  | A                                                | G                                            | E-H-108032-T2-1-D1-1 | 0.5   | 220FGFR1     | p.I331T                      | non_synonymous_codon | UNKNOWN   |
| 16 | 360035    | G                                                | T                                            | E-H-108032-T2-1-D1-1 | 0.4   | 203AXIN1     | p.H352N                      | non_synonymous_codon | UNKNOWN   |
| 19 | 41726667  | G                                                | A                                            | E-H-108032-T2-1-D1-1 | 0.51  | 203AXL       | p.R71Q                       | non_synonymous_codon | UNKNOWN   |
| 1  | 46509469  | A                                                | G                                            | E-H-108032-T2-1-D1-1 | 0.5   | 213PIK3R3    | p.L421P                      | non_synonymous_codon | UNKNOWN   |
| 5  | 44388710  | CAAA                                             | C                                            | E-H-108032-T2-1-D1-1 | 0.041 | 242FGF10     | p.F24delF                    | inframe_codon_loss   | UNKNOWN   |
| 17 | 7578238   | TC                                               | T                                            | E-H-108032-T2-1-D1-1 | 0.021 | 234TP53      | p.E204fs*43                  | frameshift_variant   | LIKELY    |
| 17 | 37673751  | T                                                | G                                            | E-H-108033-T1-1-D1-1 | 0.037 | 1215CDK12    | p.F969V                      | non_synonymous_codon | UNKNOWN   |
| 12 | 40715870  | G                                                | C                                            | E-H-108033-T1-1-D1-1 | 0.44  | 1439LRRK2    | p.R1735P                     | non_synonymous_codon | UNKNOWN   |
| 5  | 138147939 | C                                                | T                                            | E-H-108033-T1-1-D1-1 | 0.45  | 1133CTNNA1   | p.A179V                      | non_synonymous_codon | UNKNOWN   |
| 4  | 55138608  | G                                                | A                                            | E-H-108033-T1-1-D1-1 | 0.49  | 880PDGFRA    | p.G429R                      | non_synonymous_codon | UNKNOWN   |
| 4  | 187510037 | A                                                | A                                            | E-H-108033-T1-1-D1-1 | 0.5   | 1697FAT1     | p.N4492K                     | non_synonymous_codon | UNKNOWN   |
| 16 | 2636756   | C                                                | T                                            | E-H-108033-T1-1-D1-1 | 0.44  | 847PDPK1     | p.T402M                      | non_synonymous_codon | UNKNOWN   |
| 2  | 16082353  | T                                                | TGCCACGCCCCCGCTGTC                           | E-H-108033-T1-1-D1-1 | 0.166 | 2054MYCN     | p.P63_S64insTPPLSP           | inframe_codon_gain   | UNKNOWN   |
| 4  | 41748013  | CGCCGCGCTGCCGCG                                  | C                                            | E-H-108033-T1-1-D1-1 | 0.23  | 456PHOX2B    | p.A256_A260delAAAAA          | inframe_codon_loss   | UNKNOWN   |
| 12 | 121878753 | C                                                | CA                                           | E-H-108033-T1-1-D1-1 | 0.316 | 810KDM2B     | p.C1159fs*91                 | frameshift_variant   | UNKNOWN   |
| 9  | 139405665 | CCCG                                             | C                                            | E-H-108033-T1-1-D1-1 | 0.375 | 1833NOTCH1   | p.G842delG                   | inframe_codon_loss   | UNKNOWN   |
| 9  | 5073770   | G                                                | T                                            | E-H-108034-T1-1-D1-1 | 0.93  | 999JAK2      | p.V617F                      | non_synonymous_codon | ONCOGENIC |

|    |           |                                                       |        |                      |       |             |                 |                              |           |
|----|-----------|-------------------------------------------------------|--------|----------------------|-------|-------------|-----------------|------------------------------|-----------|
| 16 | 68855966  | G                                                     | A      | E-H-108034-T1-1-D1-1 | 0.47  | 1000CDH1    | p.A592T         | non_synonymous_codon         | UNKNOWN   |
| 3  | 189607152 | C                                                     | A      | E-H-108034-T1-1-D1-1 | 0.5   | 2198TP63    | p.P511T         | non_synonymous_codon         | UNKNOWN   |
| 19 | 15349652  | C                                                     | T      | E-H-108034-T1-1-D1-1 | 0.5   | 1040BRD4    | p.A1308T        | non_synonymous_codon         | UNKNOWN   |
| 18 | 42531907  | G                                                     | T      | E-H-108034-T1-1-D1-1 | 0.45  | 976SETBP1   | p.D868Y         | non_synonymous_codon         | ONCOGENIC |
| 7  | 148506477 | C                                                     | T      | E-H-108034-T1-1-D1-1 | 0.43  | 1259EZH2    | p.V679M         | non_synonymous_codon         | ONCOGENIC |
| 12 | 40761466  | G                                                     | A      | E-H-108034-T1-1-D1-1 | 0.47  | 1364LRRK2   | p.V2495I        | non_synonymous_codon         | UNKNOWN   |
| 9  | 87570239  | C                                                     | T      | E-H-108034-T1-1-D1-1 | 0.49  | 615NTRK2    | p.P660L         | non_synonymous_codon         | UNKNOWN   |
| 12 | 57864519  | C                                                     | T      | E-H-108034-T1-1-D1-1 | 0.49  | 1229GLI1    | p.P666S         | non_synonymous_codon         | UNKNOWN   |
| 1  | 120510113 | G                                                     | T      | E-H-108034-T1-1-D1-1 | 0.49  | 1489NOTCH2  | p.Q466K         | non_synonymous_codon         | UNKNOWN   |
| 6  | 117686261 | C                                                     | T      | E-H-108034-T1-1-D1-1 | 0.47  | 1341ROS1    | p.G1027D        | non_synonymous_codon         | UNKNOWN   |
| 12 | 472260    | C                                                     | T      | E-H-108034-T1-1-D1-1 | 0.47  | 963KDM5A    | p.V181M         | non_synonymous_codon         | UNKNOWN   |
| 22 | 38369826  | C                                                     | G      | E-H-108034-T1-1-D1-1 | 0.51  | 695SOX10    | p.E359D         | non_synonymous_codon         | UNKNOWN   |
| 11 | 92532829  | G                                                     | A      | E-H-108034-T1-1-D1-1 | 0.5   | 1724FAT3    | p.G2217D        | non_synonymous_codon         | UNKNOWN   |
| 19 | 30308425  | A                                                     | G      | E-H-108035-T1-1-D1-1 | 0.5   | 1397CCNE1   | p.I147V         | non_synonymous_codon         | UNKNOWN   |
| X  | 66766350  | G                                                     | GGGT   | E-H-108035-T1-1-D1-1 | 0.136 | 641AR       | p.G473_E474insG | inframe_codon_gain           | UNKNOWN   |
| 17 | 74732959  | G                                                     | C      | E-H-108036-T1-1-D1-1 | 0.42  | 511SRSF2    | p.P95R          | non_synonymous_codon         | ONCOGENIC |
| 15 | 90631934  | C                                                     | T      | E-H-108036-T1-1-D1-1 | 0.42  | 12171DH2    | p.R140Q         | non_synonymous_codon         | ONCOGENIC |
| 1  | 115258747 | C                                                     | T      | E-H-108036-T1-1-D1-1 | 0.42  | 1186NRAS    | p.G12D          | non_synonymous_codon         | ONCOGENIC |
| 2  | 25967303  | G                                                     | A      | E-H-108036-T1-1-D1-1 | 0.42  | 419ASXL2    | p.Q835*         | stop_gained                  | UNKNOWN   |
| 20 | 40713470  | G                                                     | A      | E-H-108036-T1-1-D1-1 | 0.084 | 964PTPR1    | p.R1349C        | non_synonymous_codon         | UNKNOWN   |
| 17 | 63554536  | C                                                     | T      | E-H-108036-T1-1-D1-1 | 0.5   | 809AXIN2    | p.R68Q          | non_synonymous_codon         | UNKNOWN   |
| 5  | 180057235 | C                                                     | A      | E-H-108036-T1-1-D1-1 | 0.39  | 682FLT4     | p.T168M         | non_synonymous_codon         | UNKNOWN   |
| 2  | 242066201 | C                                                     | T      | E-H-108036-T1-1-D1-1 | 0.48  | 820PASK     | p.G710D         | non_synonymous_codon         | UNKNOWN   |
| 18 | 19154416  | T                                                     | TCAA   | E-H-108036-T1-1-D1-1 | 0.399 | 2082ESCO1   | p.T129_E130insV | inframe_codon_gain           | UNKNOWN   |
| 2  | 198266834 | T                                                     | C      | E-H-108037-T1-1-D1-1 | 0.38  | 1535SF3B1   | p.K700E         | non_synonymous_codon         | ONCOGENIC |
| 12 | 40697770  | G                                                     | A      | E-H-108037-T1-1-D1-1 | 0.48  | 1475LRRK2   | p.S1204N        | non_synonymous_codon         | UNKNOWN   |
| 12 | 40702403  | G                                                     | A      | E-H-108037-T1-1-D1-1 | 0.47  | 1230LRRK2   | p.Q1365R        | non_synonymous_codon         | UNKNOWN   |
| 11 | 92569867  | G                                                     | T      | E-H-108037-T1-1-D1-1 | 0.45  | 573FAT3     | p.R3408W        | non_synonymous_codon         | UNKNOWN   |
| 2  | 58431344  | C                                                     | A      | E-H-108037-T1-1-D1-1 | 0.49  | 1041FANCL   | p.T131I         | non_synonymous_codon         | UNKNOWN   |
| 3  | 89468520  | T                                                     | C      | E-H-108037-T1-1-D1-1 | 0.44  | 986EPA3     | p.L685P         | non_synonymous_codon         | UNKNOWN   |
| 4  | 109004539 | A                                                     | C      | E-H-108038-T1-1-D1-1 | 0.43  | 642LEF1     | p.V204G         | non_synonymous_codon         | UNKNOWN   |
| 17 | 41243509  | T                                                     | C      | E-H-108038-T1-1-D1-1 | 0.47  | 1848BRCA1   | p.R1347G        | non_synonymous_codon         | UNKNOWN   |
| 16 | 23646939  | T                                                     | C      | E-H-108038-T1-1-D1-1 | 0.49  | 1665PALB2   | p.S310G         | non_synonymous_codon         | UNKNOWN   |
| 14 | 103357665 | A                                                     | T      | E-H-108038-T1-1-D1-1 | 0.52  | 644TRAF3    | p.T244S         | non_synonymous_codon         | UNKNOWN   |
| 12 | 122012485 | T                                                     | C      | E-H-108038-T1-1-D1-1 | 0.48  | 949KDM2B    | p.D122N         | non_synonymous_codon         | UNKNOWN   |
| 6  | 149982876 | C                                                     | T      | E-H-108038-T1-1-D1-1 | 0.45  | 796LATS1    | p.V1128I        | non_synonymous_codon         | UNKNOWN   |
| 19 | 13054564  | AGCAGAGGCTTAAGGAGGAGGAAGAACAAAGAAACGCAAAAGAGGAGGAGGAG | A      | E-H-108038-T1-1-D1-1 | 0.191 | 810CALR     | p.L367fs*46     | frameshift_variant           | ONCOGENIC |
| 2  | 192011484 | CT                                                    | C      | E-H-108038-T1-1-D1-1 | 0.095 | 1086STAT4   | p.?             | splice_site_variant          | UNKNOWN   |
| 5  | 131926964 | A                                                     | G      | E-H-108039-T1-1-D1-1 | 0.48  | 1287RAD50   | p.K501E         | non_synonymous_codon         | UNKNOWN   |
| 2  | 190719607 | G                                                     | A      | E-H-108039-T1-1-D1-1 | 0.48  | 1218PMS1    | p.E537K         | non_synonymous_codon         | UNKNOWN   |
| 12 | 7064576   | C                                                     | A      | E-H-108039-T1-1-D1-1 | 0.5   | 870PTPN6    | p.N225K         | non_synonymous_codon         | UNKNOWN   |
| 19 | 13054627  | AGGAGGATGATGAGGACAAAGATGAGGATGA                       | ATTGTC | E-H-108039-T1-1-D1-1 | 0.007 | 965CALR     | p.K385fs*37     | frameshift_variant           | LIKELY    |
| 19 | 13054627  | A                                                     | ATTGTC | E-H-108039-T1-1-D1-1 | 0.324 | 965CALR     | p.K385fs*47     | frameshift_variant           | LIKELY    |
| 11 | 119148871 | CAAAGGAACAATATGA                                      | C      | E-H-108039-T1-1-D1-1 | 0.291 | 670CBL      | p.?             | complex_change_in_transcript | UNKNOWN   |
| 4  | 106164861 | ACT                                                   | A      | E-H-108039-T1-1-D1-1 | 0.391 | 838TET2     | p.Y1245fs*22    | frameshift_variant           | LIKELY    |
| 7  | 151882672 | C                                                     | A      | E-H-108040-T1-1-D1-1 | 0.17  | 1744KMT2C   | p.A1685S        | non_synonymous_codon         | LIKELY    |
| 8  | 15480643  | A                                                     | G      | E-H-108040-T1-1-D1-1 | 0.42  | 907TUSC3    | p.I65V          | non_synonymous_codon         | UNKNOWN   |
| 2  | 96810968  | G                                                     | T      | E-H-108040-T1-1-D1-1 | 0.53  | 126DUSP2    | p.H42Q          | non_synonymous_codon         | UNKNOWN   |
| 14 | 95562235  | G                                                     | C      | E-H-108040-T1-1-D1-1 | 0.46  | 1194DICER1  | p.N1674K        | non_synonymous_codon         | UNKNOWN   |
| 5  | 131911535 | A                                                     | C      | E-H-108040-T1-1-D1-1 | 0.49  | 1388RAD50   | p.I94L          | non_synonymous_codon         | UNKNOWN   |
| 11 | 22646387  | T                                                     | C      | E-H-108040-T1-1-D1-1 | 0.5   | 2190FANCF   | p.K324E         | non_synonymous_codon         | UNKNOWN   |
| 19 | 13054564  | AGCAGAGGCTTAAGGAGGAGGAAGAACAAAGAAACGCAAAAGAGGAGGAGGAG | A      | E-H-108040-T1-1-D1-1 | 0.253 | 908CALR     | p.L367fs*46     | frameshift_variant           | ONCOGENIC |
| 9  | 5073770   | G                                                     | T      | E-H-108041-T1-1-D1-1 | 0.33  | 836JAK2     | p.V617F         | non_synonymous_codon         | ONCOGENIC |
| 17 | 74732959  | G                                                     | A      | E-H-108041-T1-1-D1-1 | 0.38  | 521SRSF2    | p.P95L          | non_synonymous_codon         | ONCOGENIC |
| 15 | 90631934  | C                                                     | T      | E-H-108041-T1-1-D1-1 | 0.28  | 11981DH2    | p.R140Q         | non_synonymous_codon         | ONCOGENIC |
| 1  | 115258747 | C                                                     | T      | E-H-108041-T1-1-D1-1 | 0.1   | 1127NRAS    | p.G12D          | non_synonymous_codon         | ONCOGENIC |
| 1  | 120478125 | A                                                     | C      | E-H-108041-T1-1-D1-1 | 0.48  | 1073NOTCH2  | p.F1209V        | non_synonymous_codon         | UNKNOWN   |
| 18 | 33754519  | C                                                     | T      | E-H-108041-T1-1-D1-1 | 0.43  | 533ELP2     | p.A799V         | non_synonymous_codon         | UNKNOWN   |
| 19 | 30308425  | A                                                     | G      | E-H-108041-T1-1-D1-1 | 0.49  | 892CCNE1    | p.I147V         | non_synonymous_codon         | UNKNOWN   |
| 2  | 96810968  | G                                                     | C      | E-H-108041-T1-1-D1-1 | 0.39  | 114DUSP2    | p.H42Q          | non_synonymous_codon         | UNKNOWN   |
| 2  | 215657111 | T                                                     | C      | E-H-108041-T1-1-D1-1 | 0.46  | 1155BARD1   | p.I92V          | non_synonymous_codon         | UNKNOWN   |
| 1  | 156845431 | G                                                     | A      | E-H-108041-T1-1-D1-1 | 0.47  | 887NTRK1    | p.E492K         | non_synonymous_codon         | UNKNOWN   |
| 9  | 5073770   | G                                                     | T      | E-H-108042-T1-1-D1-1 | 0.25  | 677JAK2     | p.V617F         | non_synonymous_codon         | ONCOGENIC |
| 17 | 17118598  | C                                                     | T      | E-H-108042-T1-1-D1-1 | 0.81  | 665FLCN     | p.A445T         | non_synonymous_codon         | UNKNOWN   |
| 11 | 92623798  | G                                                     | A      | E-H-108042-T1-1-D1-1 | 0.5   | 885FAT3     | p.G4430D        | non_synonymous_codon         | UNKNOWN   |
| 15 | 67482854  | C                                                     | T      | E-H-108042-T1-1-D1-1 | 0.48  | 551SMAD3    | p.R420C         | non_synonymous_codon         | UNKNOWN   |
| 6  | 26156950  | C                                                     | T      | E-H-108042-T1-1-D1-1 | 0.44  | 735HIST1H1E | p.A111V         | non_synonymous_codon         | UNKNOWN   |
| 2  | 25463289  | T                                                     | G      | E-H-108042-T1-1-D1-1 | 0.3   | 374DNMT3A   | p.Y735S         | non_synonymous_codon         | LIKELY    |
| 5  | 57752397  | A                                                     | C      | E-H-108042-T1-1-D1-1 | 0.48  | 609PLK2     | p.D392E         | non_synonymous_codon         | UNKNOWN   |
| 10 | 98127958  | C                                                     | T      | E-H-108042-T1-1-D1-1 | 0.41  | 384TLL2     | p.A979T         | non_synonymous_codon         | UNKNOWN   |
| 3  | 136062708 | A                                                     | T      | E-H-108042-T1-1-D1-1 | 0.48  | 584STAG1    | p.S1138T        | non_synonymous_codon         | UNKNOWN   |
| 14 | 95562994  | ATCC                                                  | A      | E-H-108042-T1-1-D1-1 | 0.382 | 840DICER1   | p.E1420delE     | inframe_codon_loss           | UNKNOWN   |
| 22 | 41573818  | CAGGT                                                 | C      | E-H-108042-T1-1-D1-1 | 0.232 | 1071EP300   | p.G2037fs*96    | frameshift_variant           | UNKNOWN   |
| 4  | 106194058 | AG                                                    | A      | E-H-108042-T1-1-D1-1 | 0.332 | 720TET2     | p.A1508fs*63    | frameshift_variant           | UNKNOWN   |
| 5  | 44305104  | T                                                     | G      | E-H-108043-T1-1-D1-1 | 0.49  | 826FGF10    | p.H207P         | non_synonymous_codon         | UNKNOWN   |



|    |           |                                                     |                  |                      |       |              |                     |                      |           |
|----|-----------|-----------------------------------------------------|------------------|----------------------|-------|--------------|---------------------|----------------------|-----------|
| 17 | 59760706  | A                                                   | C                | E-H-108053-T1-1-D1-1 | 0.46  | 1817BRIP1    | p.F1234C            | non_synonymous_codon | UNKNOWN   |
| 1  | 115258674 | T                                                   | C                | E-H-108053-T1-1-D1-1 | 0.33  | 1034NRAS     | p.I36M              | non_synonymous_codon | UNKNOWN   |
| 19 | 15367881  | G                                                   | A                | E-H-108053-T1-1-D1-1 | 0.51  | 1320BRD4     | p.P482L             | non_synonymous_codon | UNKNOWN   |
| 12 | 120791153 | C                                                   | T                | E-H-108053-T1-1-D1-1 | 0.56  | 773MSI1      | p.A228T             | non_synonymous_codon | UNKNOWN   |
| 17 | 37872145  | C                                                   | T                | E-H-108053-T1-1-D1-1 | 0.48  | 1712ERBB2    | p.P489L             | non_synonymous_codon | UNKNOWN   |
| 6  | 26056508  | G                                                   | A                | E-H-108053-T1-1-D1-1 | 0.48  | 1100HIST1H1C | p.A50V              | non_synonymous_codon | UNKNOWN   |
| 17 | 63533533  | A                                                   | G                | E-H-108053-T1-1-D1-1 | 0.51  | 1422AXIN2    | p.C541R             | non_synonymous_codon | UNKNOWN   |
| 6  | 162622180 | C                                                   | T                | E-H-108053-T1-1-D1-1 | 0.47  | 1091PARK2    | p.T173A             | non_synonymous_codon | UNKNOWN   |
| 5  | 180052965 | G                                                   | A                | E-H-108053-T1-1-D1-1 | 0.48  | 1097FLT4     | p.A442V             | non_synonymous_codon | UNKNOWN   |
| 16 | 2134981   | CCTT                                                | C                | E-H-108053-T1-1-D1-1 | 0.439 | 2003TSC2     | p.F1510delF         | inframe_codon_loss   | UNKNOWN   |
| 13 | 48878084  | CGCCGCCGCT                                          | C                | E-H-108053-T1-1-D1-1 | 0.337 | 786RB1       | p.A16_A18delAA      | inframe_codon_loss   | UNKNOWN   |
| 2  | 25973089  | CTTCTT                                              | C                | E-H-108053-T1-1-D1-1 | 0.35  | 1280ASXL2    | p.K444fs*3          | frameshift_variant   | UNKNOWN   |
| 18 | 31326012  | T                                                   | G                | E-H-108054-T1-1-D1-1 | 0.49  | 1148ASXL3    | p.L2067R            | non_synonymous_codon | UNKNOWN   |
| 11 | 92623798  | G                                                   | A                | E-H-108054-T1-1-D1-1 | 0.5   | 1429FAT3     | p.G4430D            | non_synonymous_codon | UNKNOWN   |
| 17 | 30293198  | G                                                   | T                | E-H-108054-T1-1-D1-1 | 0.094 | 768SUZ12     | p.G163V             | non_synonymous_codon | LIKELY    |
| 10 | 89720772  | G                                                   | A                | E-H-108054-T1-1-D1-1 | 0.49  | 1580PTEN     | p.R308H             | non_synonymous_codon | UNKNOWN   |
| 7  | 148507444 | A                                                   | T                | E-H-108054-T1-1-D1-1 | 0.42  | 1377EZH2     | p.F670L             | non_synonymous_codon | UNKNOWN   |
| 2  | 242047665 | G                                                   | A                | E-H-108054-T1-1-D1-1 | 0.47  | 1514PASK     | p.T1202M            | non_synonymous_codon | UNKNOWN   |
| 7  | 30496374  | G                                                   | A                | E-H-108054-T1-1-D1-1 | 0.5   | 1013NOD1     | p.A55V              | non_synonymous_codon | UNKNOWN   |
| 7  | 30496518  | C                                                   | T                | E-H-108054-T1-1-D1-1 | 0.47  | 1147NOD1     | p.S7N               | non_synonymous_codon | UNKNOWN   |
| 18 | 32920196  | G                                                   | A                | E-H-108054-T1-1-D1-1 | 0.44  | 1346ZNF24    | p.P140L             | non_synonymous_codon | UNKNOWN   |
| 1  | 36932258  | G                                                   | A                | E-H-108054-T1-1-D1-1 | 0.46  | 1221CSF3R    | p.P706L             | non_synonymous_codon | LIKELY    |
| 12 | 56495798  | C                                                   | T                | E-H-108054-T1-1-D1-1 | 0.46  | 846ERBB3     | p.H1330V            | non_synonymous_codon | UNKNOWN   |
| 19 | 13054564  | AGCAGAGCCTTAAGGAGGAGGAAGAAGCAAGAAACGCAAGAGGAGGAGGAG | A                | E-H-108054-T1-1-D1-1 | 0.264 | 897CALR      | p.L367fs*46         | frameshift_variant   | ONCOGENIC |
| 8  | 41790755  | C                                                   | CGCCTGTGGCTGCTGT | E-H-108054-T1-1-D1-1 | 0.19  | 395KAT6A     | p.P1651_P1662nsQQQP | inframe_codon_gain   | UNKNOWN   |
| 9  | 5073770   | G                                                   | T                | E-H-108055-T1-1-D1-1 | 0.41  | 1202JAK2     | p.V617F             | non_synonymous_codon | ONCOGENIC |
| 15 | 90631934  | C                                                   | T                | E-H-108055-T1-1-D1-1 | 0.45  | 1498DH2      | p.R140Q             | non_synonymous_codon | ONCOGENIC |
| 17 | 17118598  | C                                                   | T                | E-H-108055-T1-1-D1-1 | 0.47  | 1195FLCN     | p.A445T             | non_synonymous_codon | UNKNOWN   |
| X  | 63412863  | C                                                   | T                | E-H-108055-T1-1-D1-1 | 0.48  | 2162AMER1    | p.A102T             | non_synonymous_codon | UNKNOWN   |
| 11 | 76227206  | C                                                   | T                | E-H-108055-T1-1-D1-1 | 0.47  | 1589C11orf30 | p.R512W             | non_synonymous_codon | UNKNOWN   |
| 3  | 142269097 | A                                                   | T                | E-H-108055-T1-1-D1-1 | 0.48  | 1663ATR      | p.N951K             | non_synonymous_codon | UNKNOWN   |
| 7  | 148506435 | T                                                   | A                | E-H-108055-T1-1-D1-1 | 0.89  | 734EZH2      | p.N693Y             | non_synonymous_codon | UNKNOWN   |
| 7  | 151944991 | T                                                   | C                | E-H-108055-T1-1-D1-1 | 0.14  | 1593KMT2C    | p.K843R             | non_synonymous_codon | UNKNOWN   |
| 12 | 133253974 | C                                                   | T                | E-H-108055-T1-1-D1-1 | 0.48  | 2246POLE     | p.R259H             | non_synonymous_codon | UNKNOWN   |
| 1  | 45797914  | C                                                   | T                | E-H-108055-T1-1-D1-1 | 0.48  | 1549MUTYH    | p.G283E             | non_synonymous_codon | UNKNOWN   |
| X  | 76777847  | T                                                   | C                | E-H-108055-T1-1-D1-1 | 0.45  | 1028ATRX     | p.N2290S            | non_synonymous_codon | UNKNOWN   |
| X  | 110406896 | A                                                   | G                | E-H-108055-T1-1-D1-1 | 0.47  | 2050PAK3     | p.N272S             | non_synonymous_codon | UNKNOWN   |
| 11 | 3756555   | CT                                                  | C                | E-H-108055-T1-1-D1-1 | 0.095 | 497NUP98     | p.?                 | splice_site_variant  | UNKNOWN   |
| 20 | 31021156  | C                                                   | CTTGT            | E-H-108055-T1-1-D1-1 | 0.351 | 1015ASXL1    | p.C387fs*24         | frameshift_variant   | LIKELY    |
| 5  | 149495360 | G                                                   | A                | E-H-108056-T1-1-D1-1 | 0.49  | 471PDGFRB    | p.A1096V            | non_synonymous_codon | UNKNOWN   |
| 15 | 88472622  | G                                                   | A                | E-H-108056-T1-1-D1-1 | 0.46  | 609NTRK3     | p.R645C             | non_synonymous_codon | UNKNOWN   |
| 1  | 206942010 | G                                                   | T                | E-H-108056-T1-1-D1-1 | 0.45  | 682LIL10     | p.A170T             | non_synonymous_codon | UNKNOWN   |
| 1  | 36932047  | C                                                   | T                | E-H-108056-T1-1-D1-1 | 0.47  | 840CSF3R     | p.E835K             | non_synonymous_codon | UNKNOWN   |
| 19 | 13054564  | AGCAGAGCCTTAAGGAGGAGGAAGAAGCAAGAAACGCAAGAGGAGGAGGAG | A                | E-H-108056-T1-1-D1-1 | 0.197 | 714CALR      | p.L367fs*46         | frameshift_variant   | ONCOGENIC |
| 11 | 3756555   | CT                                                  | C                | E-H-108056-T1-1-D1-1 | 0.098 | 410NUP98     | p.?                 | splice_site_variant  | UNKNOWN   |
| 20 | 31022286  | T                                                   | TA               | E-H-108056-T1-1-D1-1 | 0.08  | 566ASXL1     | p.Y591fs*1          | frameshift_variant   | LIKELY    |
| 5  | 79506696  | CGCTGCAGCG                                          | C                | E-H-108056-T1-1-D1-1 | 0.232 | 1398MSH3     | p.A60_A62delAA      | inframe_codon_loss   | UNKNOWN   |
| 9  | 5073770   | G                                                   | T                | E-H-108057-T1-1-D1-1 | 0.22  | 1097JAK2     | p.V617F             | non_synonymous_codon | ONCOGENIC |
| 8  | 128750527 | T                                                   | C                | E-H-108057-T1-1-D1-1 | 0.48  | 2071MYC      | p.F22L              | non_synonymous_codon | LIKELY    |
| 12 | 49443634  | G                                                   | A                | E-H-108057-T1-1-D1-1 | 0.49  | 797KMT2D     | p.T1246M            | non_synonymous_codon | UNKNOWN   |
| 7  | 128845589 | C                                                   | T                | E-H-108057-T1-1-D1-1 | 0.48  | 761SMO       | p.R296C             | non_synonymous_codon | UNKNOWN   |
| 12 | 121880447 | CCTT                                                | C                | E-H-108057-T1-1-D1-1 | 0.368 | 2076KDM2B    | p.K932delK          | inframe_codon_loss   | UNKNOWN   |
| 9  | 5073770   | G                                                   | T                | E-H-108058-T1-1-D1-1 | 0.43  | 1379JAK2     | p.V617F             | non_synonymous_codon | ONCOGENIC |
| 8  | 128750527 | T                                                   | C                | E-H-108058-T1-1-D1-1 | 0.48  | 2345MYC      | p.F22L              | non_synonymous_codon | LIKELY    |
| 12 | 49443634  | G                                                   | A                | E-H-108058-T1-1-D1-1 | 0.47  | 954KMT2D     | p.T1246M            | non_synonymous_codon | UNKNOWN   |
| 20 | 31379479  | G                                                   | A                | E-H-108058-T1-1-D1-1 | 0.68  | 832DNMT3B    | p.V296I             | non_synonymous_codon | UNKNOWN   |
| 7  | 2565181   | C                                                   | T                | E-H-108058-T1-1-D1-1 | 0.48  | 1993LFGN     | p.R239W             | non_synonymous_codon | UNKNOWN   |
| 5  | 79974749  | G                                                   | A                | E-H-108058-T1-1-D1-1 | 0.48  | 749MSH3      | p.V393M             | non_synonymous_codon | UNKNOWN   |
| 2  | 141986957 | C                                                   | A                | E-H-108058-T1-1-D1-1 | 0.46  | 1614LRP1B    | p.E215D             | non_synonymous_codon | UNKNOWN   |
| 19 | 15350575  | TCTC                                                | T                | E-H-108058-T1-1-D1-1 | 0.428 | 1379BRD4     | p.E1113delE         | inframe_codon_loss   | UNKNOWN   |
| 7  | 82581487  | T                                                   | TTTC             | E-H-108058-T1-1-D1-1 | 0.766 | 1733PCLO     | p.E2927_K2928nsE    | inframe_codon_gain   | UNKNOWN   |
| 17 | 30323836  | A                                                   | T                | E-H-108059-T1-1-D1-1 | 0.27  | 779SUZ12     | p.D605V             | non_synonymous_codon | UNKNOWN   |
| 12 | 124914179 | C                                                   | T                | E-H-108059-T1-1-D1-1 | 0.5   | 1135NCOR2    | p.D377N             | non_synonymous_codon | UNKNOWN   |
| 5  | 158158076 | C                                                   | A                | E-H-108059-T1-1-D1-1 | 0.44  | 954EBF1      | p.?                 | splice_site_variant  | UNKNOWN   |
| 13 | 103518693 | G                                                   | A                | E-H-108059-T1-1-D1-1 | 0.48  | 1023ERCC5    | p.A761T             | non_synonymous_codon | UNKNOWN   |
| 2  | 242066279 | G                                                   | A                | E-H-108059-T1-1-D1-1 | 0.52  | 765PASK      | p.P684L             | non_synonymous_codon | UNKNOWN   |
| 2  | 242080058 | C                                                   | T                | E-H-108059-T1-1-D1-1 | 0.47  | 737PASK      | p.G103S             | non_synonymous_codon | UNKNOWN   |
| 19 | 13054564  | AGCAGAGCCTTAAGGAGGAGGAAGAAGCAAGAAACGCAAGAGGAGGAGGAG | A                | E-H-108059-T1-1-D1-1 | 0.225 | 717CALR      | p.L367fs*46         | frameshift_variant   | ONCOGENIC |
| 4  | 106155665 | GT                                                  | G                | E-H-108059-T1-1-D1-1 | 0.213 | 1260TET2     | p.S189fs*18         | frameshift_variant   | UNKNOWN   |
| 17 | 30264347  | T                                                   | TCGG             | E-H-108059-T1-1-D1-1 | 0.334 | 388SUZ12     | p.A30_V31nsA        | inframe_codon_gain   | UNKNOWN   |
| 5  | 131931472 | G                                                   | A                | E-H-108060-T1-1-D1-1 | 0.48  | 1239RAD50    | p.R726H             | non_synonymous_codon | UNKNOWN   |
| 17 | 17131238  | T                                                   | C                | E-H-108060-T1-1-D1-1 | 0.46  | 1649FLCN     | p.S72G              | non_synonymous_codon | UNKNOWN   |
| 1  | 120611948 | T                                                   | T                | E-H-108060-T1-1-D1-1 | 0.2   | 81NOTCH2     | p.A25T              | non_synonymous_codon | UNKNOWN   |
| 7  | 148506161 | A                                                   | G                | E-H-108060-T1-1-D1-1 | 0.95  | 1157EZH2     | p.?                 | splice_site_variant  | LIKELY    |
| 2  | 209113113 | G                                                   | A                | E-H-108060-T1-1-D1-1 | 0.46  | 879DH1       | p.R132C             | non_synonymous_codon | ONCOGENIC |

|    |           |                                                    |                  |                      |       |              |                      |                      |           |
|----|-----------|----------------------------------------------------|------------------|----------------------|-------|--------------|----------------------|----------------------|-----------|
| 17 | 59760706  | A                                                  | C                | E-H-108053-T1-1-D1-1 | 0.46  | 1817BRIP1    | p.F1234C             | non_synonymous_codon | UNKNOWN   |
| 1  | 115258674 | T                                                  | C                | E-H-108053-T1-1-D1-1 | 0.33  | 1034NBRAS    | p.I36M               | non_synonymous_codon | UNKNOWN   |
| 19 | 15367881  | G                                                  | A                | E-H-108053-T1-1-D1-1 | 0.51  | 1320BRD4     | p.P482L              | non_synonymous_codon | UNKNOWN   |
| 12 | 120791153 | C                                                  | T                | E-H-108053-T1-1-D1-1 | 0.56  | 773MSH1      | p.A228T              | non_synonymous_codon | UNKNOWN   |
| 17 | 37872145  | T                                                  | T                | E-H-108053-T1-1-D1-1 | 0.48  | 1712ERB2     | p.P489L              | non_synonymous_codon | UNKNOWN   |
| 6  | 26056508  | G                                                  | A                | E-H-108053-T1-1-D1-1 | 0.48  | 1100HIST1H1C | p.A50V               | non_synonymous_codon | UNKNOWN   |
| 17 | 63533533  | A                                                  | G                | E-H-108053-T1-1-D1-1 | 0.51  | 1422AXIN2    | p.C541R              | non_synonymous_codon | UNKNOWN   |
| 6  | 162622180 | T                                                  | C                | E-H-108053-T1-1-D1-1 | 0.47  | 1091PARK2    | p.T173A              | non_synonymous_codon | UNKNOWN   |
| 5  | 180052965 | G                                                  | A                | E-H-108053-T1-1-D1-1 | 0.48  | 1097FLT4     | p.A442V              | non_synonymous_codon | UNKNOWN   |
| 16 | 2134981   | CCTT                                               | C                | E-H-108053-T1-1-D1-1 | 0.439 | 2003TSC2     | p.F1510delF          | inframe_codon_loss   | UNKNOWN   |
| 13 | 48878084  | CGCCGCCGCT                                         | C                | E-H-108053-T1-1-D1-1 | 0.337 | 786RB1       | p.A16_A18delAA       | inframe_codon_loss   | UNKNOWN   |
| 2  | 25973089  | CTTCTT                                             | C                | E-H-108053-T1-1-D1-1 | 0.35  | 1280ASXL2    | p.K444fs*3           | frameshift_variant   | UNKNOWN   |
| 18 | 31326012  | T                                                  | G                | E-H-108054-T1-1-D1-1 | 0.49  | 1148ASXL3    | p.L2067R             | non_synonymous_codon | UNKNOWN   |
| 11 | 92623798  | G                                                  | A                | E-H-108054-T1-1-D1-1 | 0.5   | 1429FAT3     | p.G4430D             | non_synonymous_codon | UNKNOWN   |
| 17 | 30293198  | G                                                  | T                | E-H-108054-T1-1-D1-1 | 0.094 | 768SUZ12     | p.G163V              | non_synonymous_codon | LIKELY    |
| 10 | 89720772  | G                                                  | A                | E-H-108054-T1-1-D1-1 | 0.49  | 1580PTEN     | p.R308H              | non_synonymous_codon | UNKNOWN   |
| 7  | 148507444 | A                                                  | T                | E-H-108054-T1-1-D1-1 | 0.42  | 1377EZH2     | p.F670L              | non_synonymous_codon | UNKNOWN   |
| 2  | 242047665 | G                                                  | A                | E-H-108054-T1-1-D1-1 | 0.47  | 1514PASK     | p.T1202M             | non_synonymous_codon | UNKNOWN   |
| 7  | 30496374  | G                                                  | A                | E-H-108054-T1-1-D1-1 | 0.5   | 1013NOD1     | p.A55V               | non_synonymous_codon | UNKNOWN   |
| 7  | 30496518  | C                                                  | T                | E-H-108054-T1-1-D1-1 | 0.47  | 1147NOD1     | p.S7N                | non_synonymous_codon | UNKNOWN   |
| 18 | 32920196  | G                                                  | A                | E-H-108054-T1-1-D1-1 | 0.44  | 1346ZNF24    | p.P140L              | non_synonymous_codon | UNKNOWN   |
| 1  | 36932258  | A                                                  | A                | E-H-108054-T1-1-D1-1 | 0.46  | 1221CSF3R    | p.P706L              | non_synonymous_codon | LIKELY    |
| 12 | 56485798  | C                                                  | T                | E-H-108054-T1-1-D1-1 | 0.46  | 846ERBB3     | p.H1330Y             | non_synonymous_codon | UNKNOWN   |
| 19 | 13054564  | AGCAGAGGCTTAAGGAGGAGGAAGCAAGAAACGCAAAAGAGGAGGAGGAG | A                | E-H-108054-T1-1-D1-1 | 0.264 | 897CALR      | p.L367fs*46          | frameshift_variant   | ONCOGENIC |
| 8  | 41790755  | C                                                  | CGGCTGTGGCTGCTGT | E-H-108054-T1-1-D1-1 | 0.19  | 395KAT6A     | p.P1661_P1662nsQPPQP | inframe_codon_gain   | UNKNOWN   |
| 9  | 5073770   | G                                                  | T                | E-H-108055-T1-1-D1-1 | 0.41  | 1202JAK2     | p.V617F              | non_synonymous_codon | ONCOGENIC |
| 15 | 90631934  | C                                                  | T                | E-H-108055-T1-1-D1-1 | 0.45  | 1498DH2      | p.R140Q              | non_synonymous_codon | ONCOGENIC |
| 17 | 17118598  | C                                                  | T                | E-H-108055-T1-1-D1-1 | 0.47  | 1195FLCN     | p.A445T              | non_synonymous_codon | UNKNOWN   |
| X  | 63412863  | C                                                  | T                | E-H-108055-T1-1-D1-1 | 0.48  | 2162AMER1    | p.A102T              | non_synonymous_codon | UNKNOWN   |
| 11 | 76227206  | C                                                  | T                | E-H-108055-T1-1-D1-1 | 0.47  | 1589C11orf30 | p.R512W              | non_synonymous_codon | UNKNOWN   |
| 3  | 142269097 | A                                                  | T                | E-H-108055-T1-1-D1-1 | 0.48  | 1663ATR      | p.N951K              | non_synonymous_codon | UNKNOWN   |
| 7  | 148506435 | T                                                  | A                | E-H-108055-T1-1-D1-1 | 0.89  | 734EZH2      | p.N693Y              | non_synonymous_codon | UNKNOWN   |
| 7  | 151944991 | T                                                  | C                | E-H-108055-T1-1-D1-1 | 0.14  | 1593KMT2C    | p.K843R              | non_synonymous_codon | UNKNOWN   |
| 12 | 133253974 | C                                                  | C                | E-H-108055-T1-1-D1-1 | 0.48  | 2246POLE     | p.R259H              | non_synonymous_codon | UNKNOWN   |
| 1  | 45797914  | C                                                  | T                | E-H-108055-T1-1-D1-1 | 0.48  | 1549MUTYH    | p.G283E              | non_synonymous_codon | UNKNOWN   |
| X  | 76777847  | T                                                  | A                | E-H-108055-T1-1-D1-1 | 0.45  | 1028ATRX     | p.N2290S             | non_synonymous_codon | UNKNOWN   |
| X  | 110406896 | A                                                  | G                | E-H-108055-T1-1-D1-1 | 0.47  | 2050PAK3     | p.N272S              | non_synonymous_codon | UNKNOWN   |
| 11 | 3756555   | CT                                                 | C                | E-H-108055-T1-1-D1-1 | 0.095 | 497NUP98     | p.?                  | splice_site_variant  | UNKNOWN   |
| 20 | 31021156  | C                                                  | CTTGT            | E-H-108055-T1-1-D1-1 | 0.351 | 1015ASXL1    | p.C387fs*24          | frameshift_variant   | LIKELY    |
| 5  | 149495360 | G                                                  | A                | E-H-108056-T1-1-D1-1 | 0.49  | 471PDGFRB    | p.A1096V             | non_synonymous_codon | UNKNOWN   |
| 15 | 88472622  | G                                                  | A                | E-H-108056-T1-1-D1-1 | 0.46  | 869NTRK3     | p.R645C              | non_synonymous_codon | UNKNOWN   |
| 1  | 208942010 | T                                                  | C                | E-H-108056-T1-1-D1-1 | 0.45  | 862IL10      | p.A170T              | non_synonymous_codon | UNKNOWN   |
| 1  | 38932047  | C                                                  | T                | E-H-108056-T1-1-D1-1 | 0.47  | 840CSF3R     | p.E835K              | non_synonymous_codon | UNKNOWN   |
| 19 | 13054564  | AGCAGAGGCTTAAGGAGGAGGAAGCAAGAAACGCAAAAGAGGAGGAGGAG | A                | E-H-108056-T1-1-D1-1 | 0.197 | 714CALR      | p.L367fs*46          | frameshift_variant   | ONCOGENIC |
| 11 | 3756555   | CT                                                 | C                | E-H-108056-T1-1-D1-1 | 0.098 | 410NUP98     | p.?                  | splice_site_variant  | UNKNOWN   |
| 20 | 31022286  | T                                                  | TA               | E-H-108056-T1-1-D1-1 | 0.08  | 566ASXL1     | p.Y591fs*1           | frameshift_variant   | LIKELY    |
| 5  | 79950696  | CGCTGCAGCG                                         | C                | E-H-108056-T1-1-D1-1 | 0.232 | 1398MSH3     | p.A60_A62delAA       | inframe_codon_loss   | UNKNOWN   |
| 9  | 5073770   | G                                                  | T                | E-H-108057-T1-1-D1-1 | 0.22  | 1097JAK2     | p.V617F              | non_synonymous_codon | ONCOGENIC |
| 8  | 128750527 | T                                                  | C                | E-H-108057-T1-1-D1-1 | 0.48  | 2071MYC      | p.F22L               | non_synonymous_codon | LIKELY    |
| 12 | 49443634  | G                                                  | A                | E-H-108057-T1-1-D1-1 | 0.49  | 797KMT2D     | p.T1246M             | non_synonymous_codon | UNKNOWN   |
| 7  | 128845589 | C                                                  | T                | E-H-108057-T1-1-D1-1 | 0.48  | 761SMO       | p.R296C              | non_synonymous_codon | UNKNOWN   |
| 12 | 121880447 | CCTT                                               | C                | E-H-108057-T1-1-D1-1 | 0.368 | 2076KDM2B    | p.K932delK           | inframe_codon_loss   | UNKNOWN   |
| 9  | 5073770   | G                                                  | T                | E-H-108058-T1-1-D1-1 | 0.43  | 1379JAK2     | p.V617F              | non_synonymous_codon | ONCOGENIC |
| 8  | 128750527 | T                                                  | C                | E-H-108058-T1-1-D1-1 | 0.48  | 2345MYC      | p.F22L               | non_synonymous_codon | LIKELY    |
| 12 | 49443634  | G                                                  | A                | E-H-108058-T1-1-D1-1 | 0.47  | 954KMT2D     | p.T1246M             | non_synonymous_codon | UNKNOWN   |
| 20 | 31379479  | G                                                  | A                | E-H-108058-T1-1-D1-1 | 0.68  | 832DNMT3B    | p.V296I              | non_synonymous_codon | UNKNOWN   |
| 7  | 2565181   | C                                                  | T                | E-H-108058-T1-1-D1-1 | 0.48  | 1993LFNG     | p.R239W              | non_synonymous_codon | UNKNOWN   |
| 5  | 79974749  | G                                                  | A                | E-H-108058-T1-1-D1-1 | 0.48  | 749MSH3      | p.V393M              | non_synonymous_codon | UNKNOWN   |
| 2  | 141986957 | C                                                  | A                | E-H-108058-T1-1-D1-1 | 0.46  | 1614LRP1B    | p.E215D              | non_synonymous_codon | UNKNOWN   |
| 19 | 15350575  | TCTC                                               | T                | E-H-108058-T1-1-D1-1 | 0.428 | 1379BRD4     | p.E1113delE          | inframe_codon_loss   | UNKNOWN   |
| 7  | 82581487  | T                                                  | TTTC             | E-H-108058-T1-1-D1-1 | 0.766 | 1733PCLO     | p.E2927_K2928nsE     | inframe_codon_gain   | UNKNOWN   |
| 17 | 30323836  | A                                                  | T                | E-H-108059-T1-1-D1-1 | 0.27  | 779SUZ12     | p.D605V              | non_synonymous_codon | UNKNOWN   |
| 12 | 124914179 | C                                                  | T                | E-H-108059-T1-1-D1-1 | 0.5   | 1135NCOR2    | p.D377N              | non_synonymous_codon | UNKNOWN   |
| 5  | 158158076 | C                                                  | A                | E-H-108059-T1-1-D1-1 | 0.44  | 954EBF1      | p.?                  | splice_site_variant  | UNKNOWN   |
| 13 | 103518693 | G                                                  | A                | E-H-108059-T1-1-D1-1 | 0.48  | 1023ERCC5    | p.A761T              | non_synonymous_codon | UNKNOWN   |
| 2  | 242066279 | G                                                  | A                | E-H-108059-T1-1-D1-1 | 0.52  | 765PASK      | p.P684L              | non_synonymous_codon | UNKNOWN   |
| 2  | 242080058 | C                                                  | T                | E-H-108059-T1-1-D1-1 | 0.47  | 737PASK      | p.G103S              | non_synonymous_codon | UNKNOWN   |
| 19 | 13054564  | AGCAGAGGCTTAAGGAGGAGGAAGCAAGAAACGCAAAAGAGGAGGAGGAG | A                | E-H-108059-T1-1-D1-1 | 0.225 | 717CALR      | p.L367fs*46          | frameshift_variant   | ONCOGENIC |
| 4  | 106155665 | GT                                                 | G                | E-H-108059-T1-1-D1-1 | 0.213 | 1260TET2     | p.S189fs*18          | frameshift_variant   | UNKNOWN   |
| 17 | 30264347  | T                                                  | TCGG             | E-H-108059-T1-1-D1-1 | 0.334 | 368SUZ12     | p.A30_V31nsA         | inframe_codon_gain   | UNKNOWN   |
| 5  | 131931472 | G                                                  | A                | E-H-108060-T1-1-D1-1 | 0.48  | 1239RAD50    | p.R726H              | non_synonymous_codon | UNKNOWN   |
| 17 | 17131238  | T                                                  | C                | E-H-108060-T1-1-D1-1 | 0.46  | 1649FLCN     | p.S72G               | non_synonymous_codon | UNKNOWN   |
| 1  | 120611948 | T                                                  | T                | E-H-108060-T1-1-D1-1 | 0.2   | 81NOTCH2     | p.A25T               | non_synonymous_codon | UNKNOWN   |
| 7  | 148506161 | A                                                  | G                | E-H-108060-T1-1-D1-1 | 0.95  | 1157EZH2     | p.?                  | splice_site_variant  | LIKELY    |
| 2  | 209113113 | G                                                  | A                | E-H-108060-T1-1-D1-1 | 0.46  | 879IDH1      | p.R132C              | non_synonymous_codon | ONCOGENIC |

|    |           |                                                   |         |                      |       |              |                            |                        |           |
|----|-----------|---------------------------------------------------|---------|----------------------|-------|--------------|----------------------------|------------------------|-----------|
| 18 | 31325847  | A                                                 | G       | E-H-108070-T1-1-D1-1 | 0.48  | 897ASXL3     | p.K2012R                   | non_synonymous_codon   | UNKNOWN   |
| 12 | 46242680  | G                                                 | T       | E-H-108070-T1-1-D1-1 | 0.07  | 1501ARID2    | p.E548*                    | stop_gained            | UNKNOWN   |
| 14 | 68353784  | G                                                 | T       | E-H-108070-T1-1-D1-1 | 0.44  | 844RAD51B    | p.V207L                    | non_synonymous_codon   | UNKNOWN   |
| 12 | 115112299 | G                                                 | A       | E-H-108070-T1-1-D1-1 | 0.5   | 593TBX3      | p.P481S                    | non_synonymous_codon   | UNKNOWN   |
| 13 | 41134320  | C                                                 | G       | E-H-108070-T1-1-D1-1 | 0.51  | 1370FOXO1    | p.Q436H                    | non_synonymous_codon   | UNKNOWN   |
| 12 | 49422892  | A                                                 | A       | E-H-108070-T1-1-D1-1 | 0.44  | 769KMT2D     | p.R4735W                   | non_synonymous_codon   | UNKNOWN   |
| 17 | 63533026  | G                                                 | G       | E-H-108070-T1-1-D1-1 | 0.5   | 1816AXIN2    | p.M623T                    | non_synonymous_codon   | UNKNOWN   |
| 17 | 41244213  | TCTTG                                             | T       | E-H-108070-T1-1-D1-1 | 0.366 | 1465BRCA1    | p.Q1111fs*5                | frameshift_variant     | UNKNOWN   |
| 9  | 5073770   | G                                                 | T       | E-H-108071-T1-1-D1-1 | 0.2   | 1246JAK2     | p.V617F                    | non_synonymous_codon   | ONCOGENIC |
| 21 | 44514777  | T                                                 | C       | E-H-108071-T1-1-D1-1 | 0.11  | 1341U2AF1    | p.Q157R                    | non_synonymous_codon   | ONCOGENIC |
| 4  | 55964925  | G                                                 | A       | E-H-108071-T1-1-D1-1 | 0.46  | 1630KDR      | p.T771M                    | non_synonymous_codon   | UNKNOWN   |
| 6  | 15520399  | C                                                 | G       | E-H-108071-T1-1-D1-1 | 0.45  | 1856JARID2   | p.P1220A                   | non_synonymous_codon   | UNKNOWN   |
| 3  | 189526156 | G                                                 | C       | E-H-108071-T1-1-D1-1 | 0.47  | 2335TP63     | p.Q140H                    | non_synonymous_codon   | UNKNOWN   |
| 9  | 22006147  | C                                                 | T       | E-H-108071-T1-1-D1-1 | 0.46  | 1185CDKN2B   | p.D86N                     | non_synonymous_codon   | UNKNOWN   |
| 17 | 56436023  | G                                                 | A       | E-H-108071-T1-1-D1-1 | 0.49  | 596RNF43     | p.P372S                    | non_synonymous_codon   | UNKNOWN   |
| 12 | 49425001  | G                                                 | A       | E-H-108071-T1-1-D1-1 | 0.48  | 1680KMT2D    | p.A4496V                   | non_synonymous_codon   | UNKNOWN   |
| 10 | 88676927  | C                                                 | G       | E-H-108071-T1-1-D1-1 | 0.45  | 1280BMPR1A   | p.R238G                    | non_synonymous_codon   | UNKNOWN   |
| 2  | 98930966  | C                                                 | A       | E-H-108071-T1-1-D1-1 | 0.48  | 1567TMEM127  | p.A52S                     | non_synonymous_codon   | UNKNOWN   |
| 20 | 31022402  | TCACCCTGCCATAGAGAGCGGGC                           | T       | E-H-108071-T1-1-D1-1 | 0.113 | 335ASXL1     | p.E635fs*15                | frameshift_variant     | LIKELY    |
| 22 | 41574510  | TCAG                                              | T       | E-H-108071-T1-1-D1-1 | 0.439 | 1589EP300    | p.Q2268delQ                | inframe_codon_loss     | UNKNOWN   |
| 9  | 5073770   | G                                                 | T       | E-H-108072-T1-1-D1-1 | 0.29  | 997JAK2      | p.V617F                    | non_synonymous_codon   | ONCOGENIC |
| 21 | 44514777  | T                                                 | G       | E-H-108072-T1-1-D1-1 | 0.35  | 1181U2AF1    | p.Q157P                    | non_synonymous_codon   | ONCOGENIC |
| 2  | 211466932 | G                                                 | A       | E-H-108072-T1-1-D1-1 | 0.47  | 759CPS1      | p.D578N                    | non_synonymous_codon   | UNKNOWN   |
| 16 | 2611895   | ACGAC                                             | C       | E-H-108072-T1-1-D1-1 | 0.213 | 3193PDPK1    | p.D151fs*42                | frameshift_variant     | UNKNOWN   |
| 7  | 6037055   | CTG                                               | A       | E-H-108072-T1-1-D1-1 | 0.086 | 706PMS2      | p.?                        | splice_site_variant    | UNKNOWN   |
| 20 | 31023519  | GC                                                | G       | E-H-108072-T1-1-D1-1 | 0.33  | 889ASXL1     | p.S1003fs*21               | frameshift_variant     | UNKNOWN   |
| 1  | 115258747 | C                                                 | A       | E-H-108073-T1-1-D1-1 | 0.23  | 1558NRAS     | p.G12V                     | non_synonymous_codon   | ONCOGENIC |
| 7  | 82583427  | G                                                 | A       | E-H-108073-T1-1-D1-1 | 0.5   | 1570PCLO     | p.P2281L                   | non_synonymous_codon   | UNKNOWN   |
| 17 | 41226488  | C                                                 | A       | E-H-108073-T1-1-D1-1 | 0.47  | 1473BRCA1    | p.S1533I                   | non_synonymous_codon   | UNKNOWN   |
| 16 | 85952023  | C                                                 | T       | E-H-108073-T1-1-D1-1 | 0.49  | 1107IRF8     | p.A201V                    | non_synonymous_codon   | UNKNOWN   |
| 18 | 19154632  | T                                                 | C       | E-H-108073-T1-1-D1-1 | 0.48  | 1889ESCO1    | p.N58S                     | non_synonymous_codon   | UNKNOWN   |
| 2  | 58468447  | A                                                 | G       | E-H-108073-T1-1-D1-1 | 0.47  | 886FANCL     | p.M1T                      | initiator_codon_change | UNKNOWN   |
| 10 | 129902839 | C                                                 | C       | E-H-108073-T1-1-D1-1 | 0.46  | 1630MKI67    | p.R2422K                   | non_synonymous_codon   | UNKNOWN   |
| 2  | 25469624  | TC                                                | T       | E-H-108073-T1-1-D1-1 | 0.009 | 1224DNMT3A   | p.K382fs*25                | frameshift_variant     | LIKELY    |
| 14 | 102551254 | C                                                 | CTTCTTT | E-H-108073-T1-1-D1-1 | 0.223 | 2639HSP90AA1 | p.E370_E371ins<br>KE       | inframe_codon_gain     | UNKNOWN   |
| 16 | 3808050   | CT                                                | C       | E-H-108073-T1-1-D1-1 | 0.091 | 757CREBBP    | p.?                        | splice_site_variant    | UNKNOWN   |
| 13 | 25077802  | G                                                 | A       | E-H-108074-T1-1-D1-1 | 0.47  | 1524PARP4    | p.S38F                     | non_synonymous_codon   | UNKNOWN   |
| 15 | 88678553  | T                                                 | C       | E-H-108074-T1-1-D1-1 | 0.51  | 568NTRK3     | p.N328S                    | non_synonymous_codon   | UNKNOWN   |
| 5  | 35871197  | G                                                 | A       | E-H-108074-T1-1-D1-1 | 0.49  | 995IL7R      | p.R140Q                    | non_synonymous_codon   | UNKNOWN   |
| 5  | 149502624 | A                                                 | A       | E-H-108074-T1-1-D1-1 | 0.52  | 563PDGFRB    | p.V722F                    | non_synonymous_codon   | UNKNOWN   |
| 7  | 6027128   | G                                                 | C       | E-H-108074-T1-1-D1-1 | 0.46  | 1440PMS2     | p.A423G                    | non_synonymous_codon   | UNKNOWN   |
| 19 | 13054564  | AGCAGAGGCTTAAGGAGGAGGAAGACAAGAAACGCAAAAGGAGGAGGAG | A       | E-H-108074-T1-1-D1-1 | 0.188 | 778CALR      | p.L367fs*46                | frameshift_variant     | ONCOGENIC |
| 3  | 70008501  | G                                                 | A       | E-H-108075-T1-1-D1-1 | 0.059 | 844MITF      | p.R364H                    | non_synonymous_codon   | UNKNOWN   |
| 9  | 97869376  | T                                                 | C       | E-H-108075-T1-1-D1-1 | 0.48  | 573FANCC     | p.H502R                    | non_synonymous_codon   | UNKNOWN   |
| 6  | 117714393 | T                                                 | C       | E-H-108075-T1-1-D1-1 | 0.51  | 1047ROS1     | p.Y419C                    | non_synonymous_codon   | UNKNOWN   |
| 1  | 162745629 | G                                                 | C       | E-H-108075-T1-1-D1-1 | 0.36  | 1199DDR2     | p.V682L                    | non_synonymous_codon   | UNKNOWN   |
| 17 | 37864584  | A                                                 | C       | E-H-108075-T1-1-D1-1 | 0.46  | 807ERBB2     | p.E79A                     | non_synonymous_codon   | UNKNOWN   |
| 19 | 19256620  | C                                                 | C       | E-H-108075-T1-1-D1-1 | 0.53  | 422MEF2B     | p.G365S                    | non_synonymous_codon   | UNKNOWN   |
| 19 | 18271319  | T                                                 | T       | E-H-108075-T1-1-D1-1 | 0.47  | 1361PIK3R2   | p.P121S                    | non_synonymous_codon   | UNKNOWN   |
| X  | 47426061  | C                                                 | T       | E-H-108075-T1-1-D1-1 | 0.47  | 1169ARAF     | p.P194L                    | non_synonymous_codon   | UNKNOWN   |
| 20 | 31022402  | TCACCCTGCCATAGAGAGCGGGC                           | T       | E-H-108075-T1-1-D1-1 | 0.032 | 250ASXL1     | p.E635fs*15                | frameshift_variant     | LIKELY    |
| 19 | 13054567  | AGAGGCTTAAGGAGGAGGAAGAACAAGAAACGCAAAAGGAGGAGGAG   | A       | E-H-108075-T1-1-D1-1 | 0.225 | 792CALR      | p.L367fs*48                | frameshift_variant     | ONCOGENIC |
| 9  | 5073770   | G                                                 | T       | E-H-108076-T1-1-D1-1 | 0.56  | 1464JAK2     | p.V617F                    | non_synonymous_codon   | ONCOGENIC |
| 8  | 15480643  | A                                                 | G       | E-H-108076-T1-1-D1-1 | 0.49  | 1155TUSC3    | p.I65V                     | non_synonymous_codon   | UNKNOWN   |
| X  | 53222633  | G                                                 | A       | E-H-108076-T1-1-D1-1 | 1     | 584KDM5C     | p.R1435C                   | non_synonymous_codon   | UNKNOWN   |
| 9  | 93606540  | T                                                 | A       | E-H-108076-T1-1-D1-1 | 0.51  | 1586SYK      | p.F120L                    | non_synonymous_codon   | UNKNOWN   |
| 12 | 124950799 | C                                                 | T       | E-H-108076-T1-1-D1-1 | 0.48  | 1136NCOR2    | p.E209K                    | non_synonymous_codon   | UNKNOWN   |
| 6  | 26156632  | C                                                 | T       | E-H-108076-T1-1-D1-1 | 0.48  | 383HIST1H1E  | p.A5V                      | non_synonymous_codon   | UNKNOWN   |
| 8  | 41790761  | TGGTGCTGTGGAGCGGTGGTGGC                           | T       | E-H-108076-T1-1-D1-1 | 0.28  | 289KAT6A     | p.P1652_P1659<br>delPPPPQP | inframe_codon_loss     | UNKNOWN   |
| 9  | 5073770   | G                                                 | T       | E-H-108091-T1-1-D1-1 | 0.3   | 315JAK2      | p.V617F                    | non_synonymous_codon   | ONCOGENIC |
| 17 | 74732959  | G                                                 | A       | E-H-108091-T1-1-D1-1 | 0.28  | 356SRSF2     | p.P95L                     | non_synonymous_codon   | ONCOGENIC |
| X  | 70470277  | C                                                 | T       | E-H-108091-T1-1-D1-1 | 0.35  | 252ZMYM3     | p.?                        | splice_site_variant    | UNKNOWN   |
| 9  | 98209549  | T                                                 | C       | E-H-108091-T1-1-D1-1 | 0.47  | 765PTCH1     | p.H1330R                   | non_synonymous_codon   | UNKNOWN   |
| 16 | 68772239  | G                                                 | A       | E-H-108091-T1-1-D1-1 | 0.43  | 882CDH1      | p.P30T                     | non_synonymous_codon   | UNKNOWN   |
| 3  | 37045956  | C                                                 | A       | E-H-108091-T1-1-D1-1 | 0.46  | 477MLH1      | p.C124Y                    | non_synonymous_codon   | UNKNOWN   |
| 3  | 89448530  | A                                                 | A       | E-H-108091-T1-1-D1-1 | 0.46  | 340EPHA3     | p.S498R                    | non_synonymous_codon   | UNKNOWN   |
| 16 | 2611895   | ACGAC                                             | A       | E-H-108091-T1-1-D1-1 | 0.189 | 3828POPK1    | p.D151fs*42                | frameshift_variant     | UNKNOWN   |
| 7  | 151882672 | C                                                 | A       | E-H-108092-T1-1-D1-1 | 0.11  | 840KMT2C     | p.A1885S                   | non_synonymous_codon   | LIKELY    |
| 3  | 70014199  | C                                                 | A       | E-H-108092-T1-1-D1-1 | 0.47  | 638MITF      | p.L455I                    | non_synonymous_codon   | UNKNOWN   |
| 7  | 82584378  | G                                                 | A       | E-H-108092-T1-1-D1-1 | 0.49  | 1033PCLO     | p.T1964M                   | non_synonymous_codon   | UNKNOWN   |
| 6  | 15496670  | A                                                 | G       | E-H-108092-T1-1-D1-1 | 0.45  | 1139JARID2   | p.N405S                    | non_synonymous_codon   | UNKNOWN   |
| 6  | 162206861 | G                                                 | G       | E-H-108092-T1-1-D1-1 | 0.49  | 279PARK2     | p.L272I                    | non_synonymous_codon   | UNKNOWN   |
| 18 | 31324527  | C                                                 | T       | E-H-108092-T1-1-D1-1 | 0.45  | 495ASXL3     | p.P1572L                   | non_synonymous_codon   | UNKNOWN   |
| 5  | 158139272 | T                                                 | C       | E-H-108092-T1-1-D1-1 | 0.48  | 924EBF1      | p.N480S                    | non_synonymous_codon   | UNKNOWN   |
| 8  | 41794796  | ATCT                                              | A       | E-H-108092-T1-1-D1-1 | 0.402 | 632KAT6A     | p.E1109delE                | inframe_codon_loss     | UNKNOWN   |



|    |           |    |                                                                                                                                                                                                                                                                                                                                                             |      |                                             |                      |            |              |                                |                       |           |
|----|-----------|----|-------------------------------------------------------------------------------------------------------------------------------------------------------------------------------------------------------------------------------------------------------------------------------------------------------------------------------------------------------------|------|---------------------------------------------|----------------------|------------|--------------|--------------------------------|-----------------------|-----------|
| 9  | 5073770   | G  |                                                                                                                                                                                                                                                                                                                                                             | T    | E-H-108093-T1-1-D1-1                        | 0.75                 | 437JAK2    | p.V617F      | non_synonymous_codon           | ONCOGENIC             |           |
| 3  | 41267276  | A  |                                                                                                                                                                                                                                                                                                                                                             | G    | E-H-108093-T1-1-D1-1                        | 0.49                 | 873CTNNB1  | p.N287S      | non_synonymous_codon           | UNKNOWN               |           |
| 19 | 15308365  | G  |                                                                                                                                                                                                                                                                                                                                                             | A    | E-H-108093-T1-1-D1-1                        | 0.47                 | 733NOTCH3  | p.P48L       | non_synonymous_codon           | UNKNOWN               |           |
| 12 | 46244127  | A  |                                                                                                                                                                                                                                                                                                                                                             | G    | E-H-108093-T1-1-D1-1                        | 0.5                  | 1019ARID2  | p.S741G      | non_synonymous_codon           | UNKNOWN               |           |
| 10 | 105202030 | C  |                                                                                                                                                                                                                                                                                                                                                             | T    | E-H-108093-T1-1-D1-1                        | 0.45                 | 955PDCD11  | p.R1590C     | non_synonymous_codon           | UNKNOWN               |           |
| 2  | 29917736  | C  |                                                                                                                                                                                                                                                                                                                                                             | T    | E-H-108093-T1-1-D1-1                        | 0.47                 | 462ALK     | p.R311H      | non_synonymous_codon           | UNKNOWN               |           |
| 2  | 25464544  | C  |                                                                                                                                                                                                                                                                                                                                                             | T    | E-H-108093-T1-1-D1-1                        | 0.45                 | 1044DNMT3A | p.V657M      | non_synonymous_codon           | UNKNOWN               |           |
| 9  | 97912338  | G  |                                                                                                                                                                                                                                                                                                                                                             | A    | E-H-108093-T1-1-D1-1                        | 0.53                 | 359FANCC   | p.R185*      | stop_gained                    | UNKNOWN               |           |
| 1  | 193181534 | A  |                                                                                                                                                                                                                                                                                                                                                             | G    | E-H-108093-T1-1-D1-1                        | 0.44                 | 936CDC73   | p.I361V      | non_synonymous_codon           | UNKNOWN               |           |
| 20 | 31022286  | T  |                                                                                                                                                                                                                                                                                                                                                             | TA   | E-H-108093-T1-1-D1-1                        | 0.454                | 269ASXL1   | p.Y591fs*1   | frameshift_variant             | LIKELY                |           |
| 17 | 74732959  | G  |                                                                                                                                                                                                                                                                                                                                                             | A    | E-H-108094-T1-1-D1-1                        | 0.46                 | 781SRSF2   | p.P95L       | non_synonymous_codon           | ONCOGENIC             |           |
| 7  | 151945330 | G  |                                                                                                                                                                                                                                                                                                                                                             | T    | E-H-108094-T1-1-D1-1                        | 0.043                | 1151KMT2C  | p.S730Y      | non_synonymous_codon           | LIKELY                |           |
| 1  | 45797950  | C  |                                                                                                                                                                                                                                                                                                                                                             | T    | E-H-108094-T1-1-D1-1                        | 0.47                 | 1393MUTYH  | p.R271Q      | non_synonymous_codon           | UNKNOWN               |           |
| X  | 1538003   | G  |                                                                                                                                                                                                                                                                                                                                                             | T    | E-H-108094-T1-1-D1-1                        | 0.49                 | 245ASMTL   | p.A417E      | non_synonymous_codon           | UNKNOWN               |           |
| 21 | 36206818  | G  |                                                                                                                                                                                                                                                                                                                                                             | A    | E-H-108094-T1-1-D1-1                        | 0.47                 | 1019RUNX1  | p.R232W      | non_synonymous_codon           | UNKNOWN               |           |
| 21 | 36231791  | T  |                                                                                                                                                                                                                                                                                                                                                             | C    | E-H-108094-T1-1-D1-1                        | 0.43                 | 1166RUNX1  | p.D198G      | non_synonymous_codon           | ONCOGENIC             |           |
| 2  | 215645751 | C  |                                                                                                                                                                                                                                                                                                                                                             | G    | E-H-108094-T1-1-D1-1                        | 0.48                 | 858BARD1   | p.A283P      | non_synonymous_codon           | UNKNOWN               |           |
| 2  | 242695381 | G  |                                                                                                                                                                                                                                                                                                                                                             | A    | E-H-108094-T1-1-D1-1                        | 0.5                  | 960D2HGDH  | p.A420T      | non_synonymous_codon           | UNKNOWN               |           |
| 9  | 6981115   | G  |                                                                                                                                                                                                                                                                                                                                                             | A    | E-H-108094-T1-1-D1-1                        | 0.46                 | 257KDM4C   | p.R371Q      | non_synonymous_codon           | UNKNOWN               |           |
| 19 | 1220590   | C  |                                                                                                                                                                                                                                                                                                                                                             | T    | E-H-108094-T1-1-D1-1                        | 0.5                  | 1186STK11  | p.P203L      | non_synonymous_codon           | UNKNOWN               |           |
| 1  | 16256519  | C  |                                                                                                                                                                                                                                                                                                                                                             | T    | E-H-108094-T1-1-D1-1                        | 0.5                  | 1299SPEN   | p.P1262S     | non_synonymous_codon           | UNKNOWN               |           |
| 17 | 56787352  | G  |                                                                                                                                                                                                                                                                                                                                                             | A    | E-H-108094-T1-1-D1-1                        | 0.48                 | 387RAD51C  | p.?          | splice_site_variant            | UNKNOWN               |           |
| 9  | 5073770   | G  |                                                                                                                                                                                                                                                                                                                                                             | T    | E-H-108095-T1-1-D1-1                        | 0.41                 | 381JAK2    | p.V617F      | non_synonymous_codon           | ONCOGENIC             |           |
| 1  | 160323977 | A  |                                                                                                                                                                                                                                                                                                                                                             | T    | E-H-108095-T1-1-D1-1                        | 0.51                 | 720NCSTN   | p.N417Y      | non_synonymous_codon           | UNKNOWN               |           |
| 10 | 63852620  | C  |                                                                                                                                                                                                                                                                                                                                                             | T    | E-H-108095-T1-1-D1-1                        | 0.39                 | 897ARID5B  | p.S1133L     | non_synonymous_codon           | UNKNOWN               |           |
| 6  | 112020756 | T  |                                                                                                                                                                                                                                                                                                                                                             | C    | E-H-108095-T1-1-D1-1                        | 0.46                 | 480FYN     | p.K272R      | non_synonymous_codon           | UNKNOWN               |           |
| 7  | 151962158 | C  |                                                                                                                                                                                                                                                                                                                                                             | T    | E-H-108095-T1-1-D1-1                        | 0.052                | 852KMT2C   | p.W383*      | stop_gained                    | UNKNOWN               |           |
| 4  | 153303478 | G  |                                                                                                                                                                                                                                                                                                                                                             | A    | E-H-108095-T1-1-D1-1                        | 0.47                 | 684FBXW7   | p.P4S        | non_synonymous_codon           | UNKNOWN               |           |
| 1  | 155874261 | C  |                                                                                                                                                                                                                                                                                                                                                             | T    | E-H-108095-T1-1-D1-1                        | 0.25                 | 662RIT1    | p.M107I      | non_synonymous_codon           | UNKNOWN               |           |
| 12 | 15654604  | A  |                                                                                                                                                                                                                                                                                                                                                             | T    | E-H-108095-T1-1-D1-1                        | 0.48                 | 598PTPRO   | p.N238Y      | non_synonymous_codon           | UNKNOWN               |           |
| 6  | 138202173 | G  |                                                                                                                                                                                                                                                                                                                                                             | A    | E-H-108095-T1-1-D1-1                        | 0.47                 | 727TNFAIP3 | p.R697K      | non_synonymous_codon           | UNKNOWN               |           |
| 10 | 63700129  | T  |                                                                                                                                                                                                                                                                                                                                                             | C    | E-H-108095-T1-1-D1-1                        | 0.49                 | 368ARID5B  | p.L155P      | non_synonymous_codon           | UNKNOWN               |           |
| 6  | 108985481 | A  |                                                                                                                                                                                                                                                                                                                                                             | A    | E-H-108095-T1-1-D1-1                        | 0.054                | 1286FOXO3  | p.S482N      | non_synonymous_codon           | UNKNOWN               |           |
| 3  | 128205835 | G  |                                                                                                                                                                                                                                                                                                                                                             | A    | E-H-108095-T1-1-D1-1                        | 0.47                 | 596GATA2   | p.P14S       | non_synonymous_codon           | UNKNOWN               |           |
| 2  | 141751640 | G  |                                                                                                                                                                                                                                                                                                                                                             | C    | E-H-108095-T1-1-D1-1                        | 0.46                 | 495LRP1B   | p.H856Q      | non_synonymous_codon           | UNKNOWN               |           |
| 20 | 31022402  | G  | TCACCACCTGCCATAGAGAGCGCGGC                                                                                                                                                                                                                                                                                                                                  | T    | E-H-108095-T1-1-D1-1                        | 0.263                | 186ASXL1   | p.E635fs*15  | frameshift_variant             | LIKELY                |           |
| X  | 15840858  | A  |                                                                                                                                                                                                                                                                                                                                                             | AT   | E-H-108095-T1-1-D1-1                        | 0.833                | 257ZRSR2   | p.E316fs*1   | frameshift_variant             | LIKELY                |           |
| 9  | 5073770   | G  |                                                                                                                                                                                                                                                                                                                                                             | T    | E-H-108096-T1-1-D1-1                        | 0.46                 | 385JAK2    | p.V617F      | non_synonymous_codon           | ONCOGENIC             |           |
| 2  | 25966129  | C  |                                                                                                                                                                                                                                                                                                                                                             | T    | E-H-108096-T1-1-D1-1                        | 0.5                  | 719ASXL2   | p.S1026N     | non_synonymous_codon           | UNKNOWN               |           |
| 17 | 59924505  | A  |                                                                                                                                                                                                                                                                                                                                                             | G    | E-H-108096-T1-1-D1-1                        | 0.48                 | 475BRIP1   | p.L195P      | non_synonymous_codon           | UNKNOWN               |           |
| 1  | 120468201 | A  |                                                                                                                                                                                                                                                                                                                                                             | T    | E-H-108096-T1-1-D1-1                        | 0.48                 | 584NOTCH2  | p.L1413H     | non_synonymous_codon           | UNKNOWN               |           |
| 17 | 41243840  | A  |                                                                                                                                                                                                                                                                                                                                                             | C    | E-H-108096-T1-1-D1-1                        | 0.45                 | 598BRCA1   | p.N1236K     | non_synonymous_codon           | UNKNOWN               |           |
| X  | 1553938   | G  | GCGACA                                                                                                                                                                                                                                                                                                                                                      | G    | E-H-108096-T1-1-D1-1                        | 0.279                | 566ASMTL   | p.V125fs*114 | frameshift_variant             | UNKNOWN               |           |
| X  | 53225873  | CT |                                                                                                                                                                                                                                                                                                                                                             | C    | E-H-108096-T1-1-D1-1                        | 0.288                | 747KDM5C   | p.E992fs*14  | frameshift_variant             | UNKNOWN               |           |
| 9  | 5073770   | G  |                                                                                                                                                                                                                                                                                                                                                             | T    | E-H-108097-T1-1-D1-1                        | 0.29                 | 425JAK2    | p.V617F      | non_synonymous_codon           | ONCOGENIC             |           |
| 21 | 44514777  | T  |                                                                                                                                                                                                                                                                                                                                                             | G    | E-H-108097-T1-1-D1-1                        | 0.3                  | 574UZAF1   | p.Q157P      | non_synonymous_codon           | ONCOGENIC             |           |
| 15 | 90631934  | C  |                                                                                                                                                                                                                                                                                                                                                             | T    | E-H-108097-T1-1-D1-1                        | 0.33                 | 1111IDH2   | p.R140Q      | non_synonymous_codon           | ONCOGENIC             |           |
| 18 | 31326012  | T  |                                                                                                                                                                                                                                                                                                                                                             | G    | E-H-108097-T1-1-D1-1                        | 0.49                 | 534ASXL3   | p.L2067R     | non_synonymous_codon           | UNKNOWN               |           |
| 17 | 78896624  | C  |                                                                                                                                                                                                                                                                                                                                                             | T    | E-H-108097-T1-1-D1-1                        | 0.51                 | 751RPTOR   | p.A874V      | non_synonymous_codon           | UNKNOWN               |           |
| 14 | 95574253  | C  |                                                                                                                                                                                                                                                                                                                                                             | T    | E-H-108097-T1-1-D1-1                        | 0.47                 | 597DICER1  | p.A872T      | non_synonymous_codon           | UNKNOWN               |           |
| 13 | 41134019  | G  |                                                                                                                                                                                                                                                                                                                                                             | A    | E-H-108097-T1-1-D1-1                        | 0.46                 | 721FOXO1   | p.R537C      | non_synonymous_codon           | UNKNOWN               |           |
| 8  | 37555584  | T  |                                                                                                                                                                                                                                                                                                                                                             | T    | TGCGACCTCGGCGGCTCCAGCTGCTCCACCTGCAGCGCGCGGA | E-H-108097-T1-1-D1-1 | 0.105      | 2529ZNF703   | p.A401_H402ins PTHLGGSSCST CSA | inframe_codon_gain    | UNKNOWN   |
| 1  | 27023908  | G  |                                                                                                                                                                                                                                                                                                                                                             | G    | GGCTCGCGCGCGCGCA                            | E-H-108097-T1-1-D1-1 | 0.133      | 368ARID1A    | p.A349_S350ins AAAAA           | inframe_codon_gain    | UNKNOWN   |
| 9  | 5073770   | G  |                                                                                                                                                                                                                                                                                                                                                             | T    |                                             | E-H-108098-T1-1-D1-1 | 0.057      | 404JAK2      | p.V617F                        | non_synonymous_codon  | ONCOGENIC |
| 7  | 151945349 | A  |                                                                                                                                                                                                                                                                                                                                                             | T    |                                             | E-H-108098-T1-1-D1-1 | 0.038      | 796KMT2C     | p.K724*                        | stop_gained           | UNKNOWN   |
| 5  | 158250313 | T  |                                                                                                                                                                                                                                                                                                                                                             | C    |                                             | E-H-108098-T1-1-D1-1 | 0.46       | 246EBF1      | p.T217A                        | non_synonymous_codon  | UNKNOWN   |
| 2  | 242795126 | G  |                                                                                                                                                                                                                                                                                                                                                             | A    |                                             | E-H-108098-T1-1-D1-1 | 0.49       | 759PDCD1     | p.P28L                         | non_synonymous_codon  | UNKNOWN   |
| 2  | 74327798  | G  |                                                                                                                                                                                                                                                                                                                                                             | A    |                                             | E-H-108098-T1-1-D1-1 | 0.47       | 1284TET3     | p.V1160I                       | non_synonymous_codon  | UNKNOWN   |
| 12 | 121879010 | C  |                                                                                                                                                                                                                                                                                                                                                             | T    |                                             | E-H-108098-T1-1-D1-1 | 0.53       | 413KDM2B     | p.R1104H                       | non_synonymous_codon  | UNKNOWN   |
| 5  | 149504392 | G  |                                                                                                                                                                                                                                                                                                                                                             | A    |                                             | E-H-108098-T1-1-D1-1 | 0.54       | 552PDGFRB    | p.R604C                        | non_synonymous_codon  | UNKNOWN   |
| 1  | 16258302  | A  |                                                                                                                                                                                                                                                                                                                                                             | G    |                                             | E-H-108099-T1-1-D1-1 | 0.48       | 943SPEN      | p.N1856S                       | non_synonymous_codon  | UNKNOWN   |
| 3  | 142274770 | T  |                                                                                                                                                                                                                                                                                                                                                             | C    |                                             | E-H-108099-T1-1-D1-1 | 0.48       | 234ATR       | p.K764E                        | non_synonymous_codon  | UNKNOWN   |
| 3  | 89390971  | G  |                                                                                                                                                                                                                                                                                                                                                             | T    |                                             | E-H-108099-T1-1-D1-1 | 0.48       | 395EPHA3     | p.S346I                        | non_synonymous_codon  | UNKNOWN   |
| 5  | 44305104  | T  |                                                                                                                                                                                                                                                                                                                                                             | G    |                                             | E-H-108100-T1-1-D1-1 | 0.5        | 1023FGF10    | p.H207P                        | non_synonymous_codon  | UNKNOWN   |
| 7  | 128850925 | G  |                                                                                                                                                                                                                                                                                                                                                             | T    |                                             | E-H-108100-T1-1-D1-1 | 0.46       | 320SMO       | p.M591R                        | non_synonymous_codon  | UNKNOWN   |
| 13 | 32893271  | A  |                                                                                                                                                                                                                                                                                                                                                             | G    |                                             | E-H-108100-T1-1-D1-1 | 0.51       | 721BRCA2     | p.Y42C                         | non_synonymous_codon  | UNKNOWN   |
| 8  | 15397977  | C  |                                                                                                                                                                                                                                                                                                                                                             | T    |                                             | E-H-108100-T1-1-D1-1 | 0.5        | 1985TUSC3    | p.A13V                         | non_synonymous_codon  | UNKNOWN   |
| 1  | 45798269  | T  |                                                                                                                                                                                                                                                                                                                                                             | C    |                                             | E-H-108100-T1-1-D1-1 | 0.47       | 1055MUTYH    | p.I220V                        | non_synonymous_codon  | UNKNOWN   |
| 3  | 176743286 | C  |                                                                                                                                                                                                                                                                                                                                                             | T    |                                             | E-H-108100-T1-1-D1-1 | 0.41       | 678TBL1XR1   | p.*515*                        | stop_retained_variant | UNKNOWN   |
| 7  | 82581484  | G  |                                                                                                                                                                                                                                                                                                                                                             | GTTT |                                             | E-H-108100-T1-1-D1-1 | 0.761      | 1190PCLO     | p.K2928_P2929insK              | inframe_codon_gain    | UNKNOWN   |
| 6  | 108882393 | G  | GGCGGGCGGGCGCGCAAGATGGCAGAGGCCCGCTTCCC CGCCCCGCTCTCTCCGCTCGAAGTGGAGCTGGACCCGAGTTGCGAGCCCCAGAGCCGTCGCGATCCTGACTGGCCCTGCAAGGCCG GAGCTCCAAGCGAGCCCTGCCAAGCCTCGGGGGAGACGGCCCGCACTCCATGATCCCCGAGGAG GAGGACGATGAAGACGACGAGGACGGCGGGGACGGCCGCTGGCCATGGCGATCGCCGGCGG OSCGGGAGCGCGCAAGCTGGCTCGGGCTGCTCCTTGGAGACTGGCCCGGCTGCTGGCAGCCGG AGGGCAAGACCCGGTCTGGCCAGCCACCGC | G    | E-H-108100-T1-1-D1-1                        | 0.005                | 1109FOXO3  | p.?          | initiator_codon_change         | UNKNOWN               |           |
| 2  | 198266832 |    | TTTCTGCTGC                                                                                                                                                                                                                                                                                                                                                  |      | TGGA                                        | E-H-108100-T1-1-D1-1 | 0.056      | 538SF3B1     | p.E697_K700delinsDP            | inframe_variant       | UNKNOWN   |
| 9  | 5073770   | G  |                                                                                                                                                                                                                                                                                                                                                             | T    |                                             | E-H-108101-T1-1-D1-1 | 0.93       | 381JAK2      | p.V617F                        | non_synonymous_codon  | ONCOGENIC |
| 2  | 27465608  | G  |                                                                                                                                                                                                                                                                                                                                                             | C    |                                             | E-H-108101-T1-1-D1-1 | 0.5        | 890CAD       | p.V2115L                       | non_synonymous_codon  | UNKNOWN   |
| 11 | 69458678  | C  |                                                                                                                                                                                                                                                                                                                                                             | G    |                                             | E-H-108101-T1-1-D1-1 | 0.52       | 448CCND1     | p.L165V                        | non_synonymous_codon  | UNKNOWN   |



|    |           |                                                     |                                            |                      |       |              |                                |                      |           |
|----|-----------|-----------------------------------------------------|--------------------------------------------|----------------------|-------|--------------|--------------------------------|----------------------|-----------|
| 4  | 109088713 | C                                                   | G                                          | E-H-108109-T1-1-D1-1 | 0.5   | 1102LEF1     | p.E71Q                         | non_synonymous_codon | UNKNOWN   |
| 11 | 92532000  | A                                                   | G                                          | E-H-108109-T1-1-D1-1 | 0.49  | 768FAT3      | p.I1941V                       | non_synonymous_codon | UNKNOWN   |
| 7  | 128852155 | C                                                   | A                                          | E-H-108109-T1-1-D1-1 | 0.49  | 2181SMO      | p.P743T                        | non_synonymous_codon | UNKNOWN   |
| 5  | 176519456 | G                                                   | A                                          | E-H-108109-T1-1-D1-1 | 0.48  | 1254FGFR4    | p.V288I                        | non_synonymous_codon | UNKNOWN   |
| 12 | 15677789  | A                                                   | G                                          | E-H-108109-T1-1-D1-1 | 0.49  | 635PTPRO     | p.S645G                        | non_synonymous_codon | UNKNOWN   |
| 6  | 306711717 | G                                                   | A                                          | E-H-108109-T1-1-D1-1 | 0.48  | 977MDC1      | p.P1748L                       | non_synonymous_codon | UNKNOWN   |
| 13 | 32893426  | C                                                   | T                                          | E-H-108109-T1-1-D1-1 | 0.48  | 679BRCA2     | p.P94S                         | non_synonymous_codon | UNKNOWN   |
| 1  | 36933526  | G                                                   | A                                          | E-H-108109-T1-1-D1-1 | 0.47  | 744CSF3R     | p.S139F                        | non_synonymous_codon | UNKNOWN   |
| 12 | 40671773  | A                                                   | G                                          | E-H-108109-T1-1-D1-1 | 0.5   | 704LRRK2     | p.I675M                        | non_synonymous_codon | UNKNOWN   |
| 12 | 56495706  | G                                                   | A                                          | E-H-108109-T1-1-D1-1 | 0.49  | 469ERBB3     | p.G1299E                       | non_synonymous_codon | UNKNOWN   |
| 7  | 151927070 | C                                                   | T                                          | E-H-108109-T1-1-D1-1 | 0.066 | 832KMT2C     | p.G972R                        | non_synonymous_codon | UNKNOWN   |
| 1  | 155649287 | C                                                   | A                                          | E-H-108109-T1-1-D1-1 | 0.49  | 594YY1AP1    | p.G151V                        | non_synonymous_codon | UNKNOWN   |
| 20 | 31023326  | TC                                                  | T                                          | E-H-108109-T1-1-D1-1 | 0.174 | 648ASXL1     | p.P938fs*7                     | frameshift_variant   | LIKELY    |
| 19 | 13054655  | TGAG                                                | T                                          | E-H-108109-T1-1-D1-1 | 0.407 | 771CALR      | p.E396delE                     | inframe_codon_loss   | LIKELY    |
| 9  | 5073770   | G                                                   | T                                          | E-H-118542-T1-1-D1-1 | 0.089 | 303JAK2      | p.V617F                        | non_synonymous_codon | ONCOGENIC |
| 11 | 77066767  | C                                                   | T                                          | E-H-118542-T1-1-D1-1 | 0.47  | 315PAK1      | p.E240K                        | non_synonymous_codon | UNKNOWN   |
| 12 | 121890936 | C                                                   | G                                          | E-H-118542-T1-1-D1-1 | 0.086 | 640KDM2B     | p.R649P                        | non_synonymous_codon | UNKNOWN   |
| 1  | 27688743  | T                                                   | C                                          | E-H-118542-T1-1-D1-1 | 0.44  | 206MAP3K6    | p.?                            | splice_site_variant  | UNKNOWN   |
| 18 | 60052119  | G                                                   | A                                          | E-H-118542-T1-1-D1-1 | 0.5   | 276TNFRSF11A | p.R568H                        | non_synonymous_codon | UNKNOWN   |
| 8  | 27645516  | C                                                   | G                                          | E-H-118542-T1-1-D1-1 | 0.45  | 488ESCO2     | p.I376M                        | non_synonymous_codon | UNKNOWN   |
| 10 | 129901163 | G                                                   | T                                          | E-H-118542-T1-1-D1-1 | 0.47  | 541MKI67     | p.V298I                        | non_synonymous_codon | UNKNOWN   |
| 10 | 129905605 | G                                                   | T                                          | E-H-118542-T1-1-D1-1 | 0.48  | 936MKI67     | p.P1500Q                       | non_synonymous_codon | UNKNOWN   |
| 1  | 179076949 | C                                                   | G                                          | E-H-118542-T1-1-D1-1 | 0.53  | 192ABL2      | p.Q1151H                       | non_synonymous_codon | UNKNOWN   |
| 7  | 151962296 | T                                                   | T                                          | E-H-118543-T1-1-D1-1 | 0.059 | 202KMT2C     | p.?                            | splice_site_variant  | UNKNOWN   |
| 20 | 31022592  | C                                                   | T                                          | E-H-118543-T1-1-D1-1 | 0.5   | 332ASXL1     | p.R893*                        | stop_gained          | ONCOGENIC |
| 19 | 15355338  | T                                                   | G                                          | E-H-118543-T1-1-D1-1 | 0.076 | 317BRD4      | p.Q762P                        | non_synonymous_codon | UNKNOWN   |
| 6  | 26124489  | A                                                   | G                                          | E-H-118543-T1-1-D1-1 | 0.49  | 737HIST1H2AC | p.K10R                         | non_synonymous_codon | UNKNOWN   |
| 3  | 41266238  | G                                                   | A                                          | E-H-118543-T1-1-D1-1 | 0.45  | 216CTNNB1    | p.V79I                         | non_synonymous_codon | UNKNOWN   |
| 14 | 95590908  | T                                                   | C                                          | E-H-118543-T1-1-D1-1 | 0.056 | 430DICER1    | p.K334R                        | non_synonymous_codon | UNKNOWN   |
| 19 | 41754430  | G                                                   | A                                          | E-H-118543-T1-1-D1-1 | 0.44  | 275AXL       | p.G517S                        | non_synonymous_codon | UNKNOWN   |
| 17 | 7577538   | C                                                   | T                                          | E-H-118543-T1-1-D1-1 | 0.1   | 333TP53      | p.R248Q                        | non_synonymous_codon | ONCOGENIC |
| 19 | 13054564  | AGCAGAGGCTTAAGGAGGAGGAAGACAAGAAACGCAAAAGAGGAGGAGGAG | A                                          | E-H-118543-T1-1-D1-1 | 0.339 | 443CALR      | p.L367fs*46                    | frameshift_variant   | ONCOGENIC |
| 14 | 95562994  | ATCC                                                | T                                          | E-H-118543-T1-1-D1-1 | 0.451 | 308DICER1    | p.E1420delE                    | inframe_codon_loss   | UNKNOWN   |
| 9  | 5073770   | G                                                   | A                                          | E-H-118544-T1-1-D1-1 | 0.06  | 232JAK2      | p.V617F                        | non_synonymous_codon | ONCOGENIC |
| 11 | 77066767  | C                                                   | T                                          | E-H-118544-T1-1-D1-1 | 0.33  | 234PAK1      | p.E240K                        | non_synonymous_codon | UNKNOWN   |
| 12 | 121890936 | C                                                   | G                                          | E-H-118544-T1-1-D1-1 | 0.075 | 319KDM2B     | p.R649P                        | non_synonymous_codon | UNKNOWN   |
| 1  | 27688743  | T                                                   | C                                          | E-H-118544-T1-1-D1-1 | 0.29  | 133MAP3K6    | p.?                            | splice_site_variant  | UNKNOWN   |
| 18 | 60052119  | G                                                   | A                                          | E-H-118544-T1-1-D1-1 | 0.32  | 136TNFRSF11A | p.R568H                        | non_synonymous_codon | UNKNOWN   |
| 8  | 27645516  | C                                                   | G                                          | E-H-118544-T1-1-D1-1 | 0.3   | 274ESCO2     | p.I376M                        | non_synonymous_codon | UNKNOWN   |
| 17 | 41246602  | T                                                   | C                                          | E-H-118544-T1-1-D1-1 | 0.21  | 258BRCA1     | p.S316G                        | non_synonymous_codon | UNKNOWN   |
| 18 | 42531182  | G                                                   | A                                          | E-H-118544-T1-1-D1-1 | 0.12  | 211SETBP1    | p.R626Q                        | non_synonymous_codon | UNKNOWN   |
| 10 | 129901163 | C                                                   | T                                          | E-H-118544-T1-1-D1-1 | 0.27  | 296MKI67     | p.V298I                        | non_synonymous_codon | UNKNOWN   |
| 19 | 13054627  | A                                                   | ATTGTC                                     | E-H-118544-T1-1-D1-1 | 0.119 | 277CALR      | p.K385fs*47                    | frameshift_variant   | LIKELY    |
| 15 | 93540315  | G                                                   | A                                          | E-H-118545-T1-1-D1-1 | 0.078 | 411CHD2      | p.E1242K                       | non_synonymous_codon | UNKNOWN   |
| 10 | 105193754 | G                                                   | A                                          | E-H-118545-T1-1-D1-1 | 0.47  | 745PDCD11    | p.R1175Q                       | non_synonymous_codon | UNKNOWN   |
| 17 | 41246602  | T                                                   | C                                          | E-H-118545-T1-1-D1-1 | 0.47  | 515BRCA1     | p.S316G                        | non_synonymous_codon | UNKNOWN   |
| 18 | 42531182  | G                                                   | A                                          | E-H-118545-T1-1-D1-1 | 0.49  | 394SETBP1    | p.R626Q                        | non_synonymous_codon | UNKNOWN   |
| 19 | 13054627  | A                                                   | ATTGTC                                     | E-H-118545-T1-1-D1-1 | 0.37  | 586CALR      | p.K385fs*47                    | frameshift_variant   | LIKELY    |
| 9  | 5073770   | G                                                   | T                                          | E-H-118546-T1-1-D1-1 | 0.57  | 601JAK2      | p.V617F                        | non_synonymous_codon | ONCOGENIC |
| 15 | 93540315  | G                                                   | A                                          | E-H-118546-T1-1-D1-1 | 0.073 | 688CHD2      | p.E1242K                       | non_synonymous_codon | UNKNOWN   |
| X  | 129147028 | G                                                   | A                                          | E-H-118546-T1-1-D1-1 | 0.48  | 533BCORL1    | p.D94N                         | non_synonymous_codon | UNKNOWN   |
| 16 | 2983494   | G                                                   | A                                          | E-H-118546-T1-1-D1-1 | 0.52  | 1355FLYWCH1  | p.R387Q                        | non_synonymous_codon | UNKNOWN   |
| 4  | 106155880 | TC                                                  | T                                          | E-H-118546-T1-1-D1-1 | 0.228 | 513TET2      | p.C262fs*31                    | frameshift_variant   | UNKNOWN   |
| X  | 70361121  | ACAGCAACAGCAGCAG                                    | A                                          | E-H-118546-T1-1-D1-1 | 0.328 | 1093MED12    | p.Q2111_Q2115 delQQQQ          | inframe_codon_loss   | UNKNOWN   |
| 9  | 5073770   | G                                                   | T                                          | E-H-118547-T1-1-D1-1 | 0.082 | 463JAK2      | p.V617F                        | non_synonymous_codon | ONCOGENIC |
| 6  | 117704600 | C                                                   | G                                          | E-H-118547-T1-1-D1-1 | 0.038 | 709ROS1      | p.M792I                        | non_synonymous_codon | UNKNOWN   |
| 12 | 40716270  | C                                                   | A                                          | E-H-118547-T1-1-D1-1 | 0.057 | 440LRRK2     | p.Q1823K                       | non_synonymous_codon | UNKNOWN   |
| 1  | 59248339  | T                                                   | C                                          | E-H-118547-T1-1-D1-1 | 0.38  | 142JUN       | p.Q135R                        | non_synonymous_codon | UNKNOWN   |
| 6  | 26056440  | C                                                   | T                                          | E-H-118547-T1-1-D1-1 | 0.45  | 555HIST1H1C  | p.V73M                         | non_synonymous_codon | UNKNOWN   |
| 1  | 36938239  | G                                                   | A                                          | E-H-118547-T1-1-D1-1 | 0.38  | 1406CSF3R    | p.A241V                        | non_synonymous_codon | UNKNOWN   |
| 2  | 242046040 | C                                                   | T                                          | E-H-118547-T1-1-D1-1 | 0.45  | 343PASK      | p.E1312K                       | non_synonymous_codon | UNKNOWN   |
| 8  | 37555584  | T                                                   | TCGCACCTCGGCGGCTCAGCTGCTCCACCTGCAGCGCGCCGA | E-H-118547-T1-1-D1-1 | 0.136 | 1598ZNF703   | p.A401_H402ins PTHLGGSSCST CSA | inframe_codon_gain   | UNKNOWN   |
| 4  | 106155880 | TC                                                  | T                                          | E-H-118547-T1-1-D1-1 | 0.014 | 348TET2      | p.C262fs*31                    | frameshift_variant   | LIKELY    |
| 22 | 41574510  | TCAG                                                | T                                          | E-H-118547-T1-1-D1-1 | 0.361 | 487EP300     | p.Q2268delQ                    | inframe_codon_loss   | UNKNOWN   |
| 9  | 5073770   | G                                                   | T                                          | E-H-118548-T1-1-D1-1 | 0.96  | 531JAK2      | p.V617F                        | non_synonymous_codon | ONCOGENIC |
| 11 | 85989482  | G                                                   | T                                          | E-H-118548-T1-1-D1-1 | 0.48  | 819EED       | p.R414L                        | non_synonymous_codon | UNKNOWN   |
| 6  | 117704600 | G                                                   | G                                          | E-H-118548-T1-1-D1-1 | 0.87  | 504ROS1      | p.M792I                        | non_synonymous_codon | UNKNOWN   |
| 1  | 162740180 | T                                                   | T                                          | E-H-118548-T1-1-D1-1 | 0.45  | 1336DDR2     | p.S461L                        | non_synonymous_codon | UNKNOWN   |
| 20 | 31383306  | C                                                   | T                                          | E-H-118548-T1-1-D1-1 | 0.47  | 664DNMT3B    | p.T296M                        | non_synonymous_codon | UNKNOWN   |
| 12 | 40716270  | C                                                   | A                                          | E-H-118548-T1-1-D1-1 | 0.5   | 584LRRK2     | p.Q1823K                       | non_synonymous_codon | UNKNOWN   |
| 2  | 242695307 | G                                                   | A                                          | E-H-118548-T1-1-D1-1 | 0.49  | 1473D2HGDH   | p.R395Q                        | non_synonymous_codon | UNKNOWN   |
| 22 | 30054230  | G                                                   | A                                          | E-H-118548-T1-1-D1-1 | 0.45  | 1035NF2      | p.G218S                        | non_synonymous_codon | UNKNOWN   |
| 19 | 35823714  | A                                                   | C                                          | E-H-118548-T1-1-D1-1 | 0.56  | 497CD22      | p.K100T                        | non_synonymous_codon | UNKNOWN   |
| 20 | 54961561  | C                                                   | T                                          | E-H-118548-T1-1-D1-1 | 0.91  | 214AURKA     | p.R24H                         | non_synonymous_codon | UNKNOWN   |
| 12 | 16762468  | G                                                   | A                                          | E-H-118548-T1-1-D1-1 | 0.47  | 735PIK3C2G   | p.?                            | splice_site_variant  | UNKNOWN   |

|    |           |                                                       |   |                      |       |             |                         |                      |           |
|----|-----------|-------------------------------------------------------|---|----------------------|-------|-------------|-------------------------|----------------------|-----------|
| 1  | 155630397 | T                                                     | C | E-H-118548-T1-1-D1-1 | 0.33  | 679YY1AP1   | p.Q573R                 | non_synonymous_codon | UNKNOWN   |
| 6  | 161781201 | G                                                     | A | E-H-118548-T1-1-D1-1 | 0.87  | 488PARK2    | p.R402C                 | non_synonymous_codon | UNKNOWN   |
| 10 | 129901084 | G                                                     | A | E-H-118548-T1-1-D1-1 | 0.51  | 638MKI67    | p.T3007M                | non_synonymous_codon | UNKNOWN   |
| 6  | 30671634  | G                                                     | A | E-H-118548-T1-1-D1-1 | 0.49  | 633MDC1     | p.P1778S                | non_synonymous_codon | UNKNOWN   |
| 2  | 58388714  | A                                                     | T | E-H-118548-T1-1-D1-1 | 0.44  | 612FANCL    | p.D326E                 | non_synonymous_codon | UNKNOWN   |
| 6  | 89791118  | C                                                     | T | E-H-118548-T1-1-D1-1 | 0.83  | 60PNRC1     | p.P169S                 | non_synonymous_codon | UNKNOWN   |
| 11 | 92534968  | G                                                     | A | E-H-118548-T1-1-D1-1 | 0.47  | 499FAT3     | p.R2930Q                | non_synonymous_codon | UNKNOWN   |
| 12 | 40702910  | C                                                     | T | E-H-118548-T1-1-D1-1 | 0.56  | 579LRRK2    | p.R1398C                | non_synonymous_codon | UNKNOWN   |
| 10 | 129904901 | C                                                     | T | E-H-118548-T1-1-D1-1 | 0.49  | 1429MKI67   | p.V173S1                | non_synonymous_codon | UNKNOWN   |
| 6  | 150004502 | A                                                     | G | E-H-118548-T1-1-D1-1 | 0.83  | 572LATS1    | p.S575P                 | non_synonymous_codon | UNKNOWN   |
| 9  | 5073770   | G                                                     | T | E-H-118549-T1-1-D1-1 | 0.35  | 218JAK2     | p.V617F                 | non_synonymous_codon | ONCOGENIC |
| 11 | 85989482  | T                                                     | G | E-H-118549-T1-1-D1-1 | 0.046 | 303EED      | p.R414L                 | non_synonymous_codon | UNKNOWN   |
| 1  | 162740180 | C                                                     | T | E-H-118549-T1-1-D1-1 | 0.05  | 440DDR2     | p.S481L                 | non_synonymous_codon | UNKNOWN   |
| 20 | 31383306  | C                                                     | T | E-H-118549-T1-1-D1-1 | 0.082 | 146DNMT3B   | p.T296M                 | non_synonymous_codon | UNKNOWN   |
| 2  | 242695307 | G                                                     | A | E-H-118549-T1-1-D1-1 | 0.071 | 553D2HGDH   | p.R395Q                 | non_synonymous_codon | UNKNOWN   |
| 22 | 30054230  | G                                                     | A | E-H-118549-T1-1-D1-1 | 0.053 | 396NF2      | p.G218S                 | non_synonymous_codon | UNKNOWN   |
| 19 | 35823714  | A                                                     | C | E-H-118549-T1-1-D1-1 | 0.068 | 191CD22     | p.K100T                 | non_synonymous_codon | UNKNOWN   |
| 20 | 54961561  | C                                                     | T | E-H-118549-T1-1-D1-1 | 0.06  | 133AURKA    | p.R24H                  | non_synonymous_codon | UNKNOWN   |
| 3  | 47165863  | A                                                     | T | E-H-118549-T1-1-D1-1 | 0.45  | 332SETD2    | p.F88Y                  | non_synonymous_codon | UNKNOWN   |
| 11 | 76257322  | C                                                     | T | E-H-118549-T1-1-D1-1 | 0.48  | 124C11orf30 | p.P1252L                | non_synonymous_codon | UNKNOWN   |
| 11 | 69589767  | G                                                     | A | E-H-118549-T1-1-D1-1 | 0.5   | 60FGF4      | p.A29V                  | non_synonymous_codon | UNKNOWN   |
| 4  | 109010339 | C                                                     | A | E-H-118549-T1-1-D1-1 | 0.42  | 292LEF1     | p.E163D                 | non_synonymous_codon | UNKNOWN   |
| 11 | 92533558  | G                                                     | A | E-H-118549-T1-1-D1-1 | 0.45  | 224FAT3     | p.R2460Q                | non_synonymous_codon | UNKNOWN   |
| 22 | 46725339  | G                                                     | T | E-H-118549-T1-1-D1-1 | 0.45  | 335GTSE1    | p.D671Y                 | non_synonymous_codon | UNKNOWN   |
| 13 | 110436780 | C                                                     | T | E-H-118549-T1-1-D1-1 | 0.41  | 926IRS2     | p.G541R                 | non_synonymous_codon | UNKNOWN   |
| 12 | 57858964  | T                                                     | C | E-H-118550-T1-1-D1-1 | 0.45  | 320GLI1     | p.C154R                 | non_synonymous_codon | UNKNOWN   |
| 11 | 61213503  | A                                                     | C | E-H-118550-T1-1-D1-1 | 0.42  | 191SDHAF2   | p.R154H                 | non_synonymous_codon | UNKNOWN   |
| 1  | 120483368 | T                                                     | C | E-H-118550-T1-1-D1-1 | 0.42  | 125NOTCH2   | p.N998S                 | non_synonymous_codon | UNKNOWN   |
| 19 | 13054567  | AGAGGCTTAAGGAGGAGGAAGAACAAAGAAACGCAAAAGAGGAGGAG       | A | E-H-118550-T1-1-D1-1 | 0.22  | 241CALR     | p.L367fs*48             | frameshift_variant   | ONCOGENIC |
| 9  | 5073770   | G                                                     | T | E-H-118551-T1-1-D1-1 | 0.96  | 355JAK2     | p.V617F                 | non_synonymous_codon | ONCOGENIC |
| 11 | 85989482  | G                                                     | T | E-H-118551-T1-1-D1-1 | 0.49  | 557EED      | p.R414L                 | non_synonymous_codon | UNKNOWN   |
| 6  | 117704600 | C                                                     | G | E-H-118551-T1-1-D1-1 | 0.85  | 329ROS1     | p.M792I                 | non_synonymous_codon | UNKNOWN   |
| 1  | 162740180 | C                                                     | T | E-H-118551-T1-1-D1-1 | 0.46  | 728DDR2     | p.S461L                 | non_synonymous_codon | UNKNOWN   |
| 20 | 31383306  | C                                                     | T | E-H-118551-T1-1-D1-1 | 0.46  | 402DNMT3B   | p.T296M                 | non_synonymous_codon | UNKNOWN   |
| 12 | 40716270  | C                                                     | A | E-H-118551-T1-1-D1-1 | 0.49  | 455LRRK2    | p.Q1823K                | non_synonymous_codon | UNKNOWN   |
| 2  | 242695307 | G                                                     | A | E-H-118551-T1-1-D1-1 | 0.49  | 821D2HGDH   | p.R395Q                 | non_synonymous_codon | UNKNOWN   |
| 22 | 30054230  | G                                                     | A | E-H-118551-T1-1-D1-1 | 0.5   | 615NF2      | p.G218S                 | non_synonymous_codon | UNKNOWN   |
| 19 | 35823714  | A                                                     | C | E-H-118551-T1-1-D1-1 | 0.48  | 357CD22     | p.K100T                 | non_synonymous_codon | UNKNOWN   |
| 20 | 54961561  | C                                                     | T | E-H-118551-T1-1-D1-1 | 0.96  | 165AURKA    | p.R24H                  | non_synonymous_codon | UNKNOWN   |
| 5  | 67576437  | C                                                     | T | E-H-118551-T1-1-D1-1 | 0.46  | 400PIK3R1   | p.T239M                 | non_synonymous_codon | UNKNOWN   |
| 12 | 18762468  | G                                                     | A | E-H-118551-T1-1-D1-1 | 0.43  | 508PIK3C2G  | p.?                     | splice_site_variant  | UNKNOWN   |
| 1  | 155630397 | T                                                     | C | E-H-118551-T1-1-D1-1 | 0.41  | 526YY1AP1   | p.Q573R                 | non_synonymous_codon | UNKNOWN   |
| 10 | 129901084 | G                                                     | A | E-H-118551-T1-1-D1-1 | 0.47  | 504MKI67    | p.T3007M                | non_synonymous_codon | UNKNOWN   |
| 6  | 30671634  | G                                                     | A | E-H-118551-T1-1-D1-1 | 0.5   | 543MDC1     | p.P1778S                | non_synonymous_codon | UNKNOWN   |
| 2  | 58388714  | A                                                     | T | E-H-118551-T1-1-D1-1 | 0.45  | 370FANCL    | p.D326E                 | non_synonymous_codon | UNKNOWN   |
| 6  | 89791118  | C                                                     | T | E-H-118551-T1-1-D1-1 | 0.76  | 17PNRC1     | p.P169S                 | non_synonymous_codon | UNKNOWN   |
| 11 | 92534968  | G                                                     | A | E-H-118551-T1-1-D1-1 | 0.46  | 376FAT3     | p.R2930Q                | non_synonymous_codon | UNKNOWN   |
| 12 | 40702910  | C                                                     | T | E-H-118551-T1-1-D1-1 | 0.57  | 383LRRK2    | p.R1398C                | non_synonymous_codon | LIKELY    |
| 6  | 150004502 | A                                                     | G | E-H-118551-T1-1-D1-1 | 0.84  | 423LATS1    | p.S575P                 | non_synonymous_codon | UNKNOWN   |
| 9  | 5073770   | G                                                     | T | E-H-118552-T1-1-D1-1 | 0.87  | 335JAK2     | p.V617F                 | non_synonymous_codon | ONCOGENIC |
| 10 | 104590739 | C                                                     | T | E-H-118552-T1-1-D1-1 | 0.43  | 410CYP17A1  | p.R416H                 | non_synonymous_codon | UNKNOWN   |
| 2  | 58459232  | G                                                     | A | E-H-118552-T1-1-D1-1 | 0.47  | 476FANCL    | p.L38F                  | non_synonymous_codon | UNKNOWN   |
| 11 | 94192594  | C                                                     | T | E-H-118552-T1-1-D1-1 | 0.44  | 432MRE11A   | p.E494K                 | non_synonymous_codon | UNKNOWN   |
| 2  | 212537896 | T                                                     | C | E-H-118552-T1-1-D1-1 | 0.57  | 283ERBB4    | p.H570R                 | non_synonymous_codon | UNKNOWN   |
| 21 | 44514777  | T                                                     | G | E-H-118553-T1-1-D1-1 | 0.29  | 289U2AF1    | p.Q157P                 | non_synonymous_codon | ONCOGENIC |
| 15 | 90631838  | C                                                     | T | E-H-118553-T1-1-D1-1 | 0.078 | 476IDH2     | p.R172K                 | non_synonymous_codon | ONCOGENIC |
| 3  | 37092019  | G                                                     | A | E-H-118553-T1-1-D1-1 | 0.48  | 202MLH1     | p.V716M                 | non_synonymous_codon | UNKNOWN   |
| 19 | 42384959  | T                                                     | C | E-H-118553-T1-1-D1-1 | 0.44  | 362CD79A    | p.M198T                 | non_synonymous_codon | UNKNOWN   |
| 10 | 105162917 | G                                                     | T | E-H-118553-T1-1-D1-1 | 0.41  | 297PDCD11   | p.V93L                  | non_synonymous_codon | UNKNOWN   |
| 2  | 191923449 | C                                                     | T | E-H-118553-T1-1-D1-1 | 0.46  | 374STAT4    | p.A361T                 | non_synonymous_codon | UNKNOWN   |
| 3  | 30664714  | G                                                     | A | I-H-106443-T2-1-D1-1 | 0.5   | 395TGFBR2   | p.D40N                  | non_synonymous_codon | UNKNOWN   |
| 12 | 31944715  | C                                                     | T | I-H-106443-T2-1-D1-1 | 0.49  | 496H3F3C    | p.R129Q                 | non_synonymous_codon | UNKNOWN   |
| 15 | 88689553  | C                                                     | G | I-H-106443-T2-1-D1-1 | 0.49  | 562NTRK3    | p.L449V                 | non_synonymous_codon | UNKNOWN   |
| 19 | 13054564  | AGCAGAGGCTTAAGGAGGAGGAAGAACAAAGAAACGCAAAAGAGGAGGAGGAG | A | I-H-106443-T2-1-D1-1 | 0.259 | 363CALR     | p.L367fs*46             | frameshift_variant   | ONCOGENIC |
| 9  | 5073770   | G                                                     | T | I-H-108077-T1-1-D1-1 | 0.4   | 545JAK2     | p.V617F                 | non_synonymous_codon | ONCOGENIC |
| 7  | 151945349 | T                                                     | A | I-H-108077-T1-1-D1-1 | 0.045 | 715KMT2C    | p.K724*                 | stop_gained          | UNKNOWN   |
| 11 | 92534043  | G                                                     | T | I-H-108077-T1-1-D1-1 | 0.52  | 698FAT3     | p.V2622F                | non_synonymous_codon | UNKNOWN   |
| 12 | 133253180 | A                                                     | T | I-H-108077-T1-1-D1-1 | 0.51  | 603POLE     | p.D287E                 | non_synonymous_codon | UNKNOWN   |
| 8  | 37693192  | C                                                     | T | I-H-108077-T1-1-D1-1 | 0.51  | 1759GPR124  | p.R852C                 | non_synonymous_codon | UNKNOWN   |
| 1  | 46597543  | A                                                     | G | I-H-108077-T1-1-D1-1 | 0.48  | 433PIK3R3   | p.F28L                  | non_synonymous_codon | UNKNOWN   |
| 17 | 63532592  | A                                                     | C | I-H-108077-T1-1-D1-1 | 0.48  | 854AXIN2    | p.W663G                 | non_synonymous_codon | UNKNOWN   |
| X  | 1553938   | GCGACA                                                | G | I-H-108077-T1-1-D1-1 | 0.245 | 755ASMTL    | p.V125fs*114            | frameshift_variant   | UNKNOWN   |
| 21 | 36164859  | ACCCGCGGGAACCTG                                       | A | I-H-108077-T1-1-D1-1 | 0.216 | 1960RUNX1   | p.Q335fs*255            | frameshift_variant   | UNKNOWN   |
| 2  | 99172077  | TGCTCGAGAGGAGCGC                                      | T | I-H-108077-T1-1-D1-1 | 0.283 | 999INPP4A   | p.Q550_L554del<br>QKERL | inframe_codon_loss   | UNKNOWN   |
| 6  | 139202191 | TGA                                                   | T | I-H-108077-T1-1-D1-1 | 0.423 | 608ECT2L    | p.D590fs*28             | frameshift_variant   | UNKNOWN   |

|    |           |                                                     |     |                     |       |              |                             |                      |           |
|----|-----------|-----------------------------------------------------|-----|---------------------|-------|--------------|-----------------------------|----------------------|-----------|
| 9  | 5073770   | G                                                   | T   | IH-108078-T1-1-D1-1 | 0.8   | 299JAK2      | p.V617F                     | non_synonymous_codon | ONCOGENIC |
| X  | 110435818 | A                                                   | G   | IH-108078-T1-1-D1-1 | 0.41  | 488PAK3      | p.N358D                     | non_synonymous_codon | UNKNOWN   |
| 15 | 91347483  | T                                                   | A   | IH-108078-T1-1-D1-1 | 0.46  | 407BLM       | p.S1209T                    | non_synonymous_codon | UNKNOWN   |
| X  | 39933332  | AGCTGCCA                                            | ACG | IH-108078-T1-1-D1-1 | 0.088 | 736BCOR      | p.G421fs*17                 | frameshift_variant   | UNKNOWN   |
| X  | 39933325  | GGAGGT                                              | G   | IH-108078-T1-1-D1-1 | 0.285 | 787BCOR      | p.P424fs*14                 | frameshift_variant   | UNKNOWN   |
| 9  | 5073770   | G                                                   | T   | IH-108079-T1-1-D1-1 | 0.59  | 409JAK2      | p.V617F                     | non_synonymous_codon | ONCOGENIC |
| 17 | 74732959  | G                                                   | T   | IH-108079-T1-1-D1-1 | 0.36  | 645SRSF2     | p.P95H                      | non_synonymous_codon | ONCOGENIC |
| 1  | 43818306  | T                                                   | A   | IH-108079-T1-1-D1-1 | 0.4   | 909MPL       | p.Y591N                     | non_synonymous_codon | LIKELY    |
| 12 | 46205257  | T                                                   | C   | IH-108079-T1-1-D1-1 | 0.38  | 690ARID2     | p.P114L                     | non_synonymous_codon | UNKNOWN   |
| 13 | 48921960  | G                                                   | A   | IH-108079-T1-1-D1-1 | 0.37  | 627RB1       | p.?                         | splice_site_variant  | UNKNOWN   |
| 13 | 48955426  | C                                                   | G   | IH-108079-T1-1-D1-1 | 0.48  | 664RB1       | p.F514L                     | non_synonymous_codon | UNKNOWN   |
| 11 | 3727756   | C                                                   | G   | IH-108079-T1-1-D1-1 | 0.51  | 422NUP98     | p.E948D                     | non_synonymous_codon | UNKNOWN   |
| 19 | 7142981   | C                                                   | G   | IH-108079-T1-1-D1-1 | 0.47  | 991INSR      | p.R796S                     | non_synonymous_codon | UNKNOWN   |
| 8  | 37699097  | C                                                   | A   | IH-108079-T1-1-D1-1 | 0.51  | 1128GPR124   | p.R1081S                    | non_synonymous_codon | UNKNOWN   |
| X  | 66766350  | GGGTGGTGGCGGGCGGGCGGGCGGGCGGGCGGGC                  | G   | IH-108079-T1-1-D1-1 | 0.055 | 451AR        | p.G461_G473del<br>GGGGGGGGG | inframe_codon_loss   | UNKNOWN   |
| 4  | 106156282 | CT                                                  | C   | IH-108079-T1-1-D1-1 | 0.828 | 705TET2      | p.K389fs*38                 | frameshift_variant   | UNKNOWN   |
| 2  | 27465608  | G                                                   | C   | IH-108080-T1-1-D1-1 | 0.48  | 657CAD       | p.V2115L                    | non_synonymous_codon | UNKNOWN   |
| 1  | 120458270 | G                                                   | C   | IH-108080-T1-1-D1-1 | 0.53  | 492NOTCH2    | p.P2359A                    | non_synonymous_codon | UNKNOWN   |
| X  | 76939515  | T                                                   | G   | IH-108080-T1-1-D1-1 | 0.13  | 869ATRX      | p.E411D                     | non_synonymous_codon | UNKNOWN   |
| 2  | 225379411 | G                                                   | A   | IH-108080-T1-1-D1-1 | 0.49  | 519CUL3      | p.R153C                     | non_synonymous_codon | UNKNOWN   |
| 10 | 105205260 | A                                                   | G   | IH-108080-T1-1-D1-1 | 0.47  | 324POCD11    | p.K1857R                    | non_synonymous_codon | UNKNOWN   |
| 5  | 176722219 | T                                                   | C   | IH-108080-T1-1-D1-1 | 0.45  | 550NSD1      | p.L2617S                    | non_synonymous_codon | UNKNOWN   |
| 6  | 32189085  | G                                                   | A   | IH-108080-T1-1-D1-1 | 0.49  | 333NOTCH4    | p.R157W                     | non_synonymous_codon | UNKNOWN   |
| 9  | 21971040  | C                                                   | T   | IH-108080-T1-1-D1-1 | 0.48  | 726CDKN2A    | p.A121T                     | non_synonymous_codon | UNKNOWN   |
| 2  | 25965376  | A                                                   | G   | IH-108080-T1-1-D1-1 | 0.47  | 692ASXL2     | p.V1277A                    | non_synonymous_codon | UNKNOWN   |
| 12 | 121947390 | C                                                   | T   | IH-108080-T1-1-D1-1 | 0.44  | 537KDM2B     | p.A543T                     | non_synonymous_codon | UNKNOWN   |
| 19 | 13054574  | TAAGGAGGAGGAAGACAAAGAAACGCAAGAGG                    | T   | IH-108080-T1-1-D1-1 | 0.317 | 410CALR      | p.K368fs*51                 | frameshift_variant   | LIKELY    |
| 9  | 5073770   | G                                                   | T   | IH-108081-T1-1-D1-1 | 0.36  | 320JAK2      | p.V617F                     | non_synonymous_codon | ONCOGENIC |
| 17 | 74732959  | G                                                   | A   | IH-108081-T1-1-D1-1 | 0.4   | 459SRSF2     | p.P95L                      | non_synonymous_codon | ONCOGENIC |
| 8  | 128750527 | T                                                   | C   | IH-108081-T1-1-D1-1 | 0.47  | 1411MYC      | p.F22L                      | non_synonymous_codon | LIKELY    |
| 20 | 57484421  | A                                                   | G   | IH-108081-T1-1-D1-1 | 0.4   | 904GNAS      | p.R202H                     | non_synonymous_codon | ONCOGENIC |
| 11 | 64128610  | G                                                   | C   | IH-108081-T1-1-D1-1 | 0.43  | 328RPS6KA4   | p.G156A                     | non_synonymous_codon | UNKNOWN   |
| 5  | 131893069 | A                                                   | C   | IH-108081-T1-1-D1-1 | 0.39  | 438RAD50     | p.E18A                      | non_synonymous_codon | UNKNOWN   |
| 14 | 38064109  | C                                                   | G   | IH-108081-T1-1-D1-1 | 0.5   | 371FOXA1     | p.Q23H                      | non_synonymous_codon | UNKNOWN   |
| 13 | 41134463  | C                                                   | T   | IH-108081-T1-1-D1-1 | 0.5   | 994FOXO1     | p.V389I                     | non_synonymous_codon | UNKNOWN   |
| 2  | 141660547 | C                                                   | G   | IH-108081-T1-1-D1-1 | 0.43  | 352LRP1B     | p.K1236N                    | non_synonymous_codon | UNKNOWN   |
| 9  | 5073770   | G                                                   | T   | IH-108082-T1-1-D1-1 | 0.077 | 517JAK2      | p.V617F                     | non_synonymous_codon | ONCOGENIC |
| 9  | 93606193  | G                                                   | A   | IH-108082-T1-1-D1-1 | 0.49  | 499SYK       | p.G5S                       | non_synonymous_codon | UNKNOWN   |
| 2  | 198266714 | C                                                   | T   | IH-108082-T1-1-D1-1 | 0.19  | 461SF3B1     | p.G740R                     | non_synonymous_codon | LIKELY    |
| 19 | 6534760   | C                                                   | T   | IH-108082-T1-1-D1-1 | 0.47  | 1178TNFSF9   | p.R150W                     | non_synonymous_codon | UNKNOWN   |
| 19 | 52693424  | T                                                   | G   | IH-108082-T1-1-D1-1 | 0.48  | 915PPP2R1A   | p.F4C                       | non_synonymous_codon | UNKNOWN   |
| 14 | 38061183  | T                                                   | A   | IH-108082-T1-1-D1-1 | 0.51  | 592FOXA1     | p.E269V                     | non_synonymous_codon | UNKNOWN   |
| 6  | 26234606  | C                                                   | T   | IH-108082-T1-1-D1-1 | 0.055 | 724HIST1H1D  | p.A186T                     | non_synonymous_codon | UNKNOWN   |
| 13 | 110436933 | C                                                   | T   | IH-108082-T1-1-D1-1 | 0.49  | 693IRS2      | p.G490S                     | non_synonymous_codon | UNKNOWN   |
| 7  | 151879489 | A                                                   | G   | IH-108082-T1-1-D1-1 | 0.71  | 807KMT2C     | p.M1819T                    | non_synonymous_codon | UNKNOWN   |
| 7  | 148512023 | CA                                                  | C   | IH-108082-T1-1-D1-1 | 0.299 | 211EZH2      | p.C552fs*123                | frameshift_variant   | UNKNOWN   |
| 1  | 27683225  | GCCT                                                | G   | IH-108082-T1-1-D1-1 | 0.4   | 1213MAP3K6   | p.E1126delE                 | inframe_codon_loss   | UNKNOWN   |
| 6  | 26234605  | GCCT                                                | G   | IH-108082-T1-1-D1-1 | 0.44  | 1326HIST1H1D | p.K185_A186del<br>nsT       | inframe_variant      | UNKNOWN   |
| 9  | 5073770   | G                                                   | T   | IH-108083-T1-1-D1-1 | 0.34  | 418JAK2      | p.V617F                     | non_synonymous_codon | ONCOGENIC |
| 7  | 151945330 | G                                                   | T   | IH-108083-T1-1-D1-1 | 0.084 | 689KMT2C     | p.S730Y                     | non_synonymous_codon | LIKELY    |
| 8  | 15480643  | A                                                   | G   | IH-108083-T1-1-D1-1 | 0.43  | 358TUSC3     | p.I65V                      | non_synonymous_codon | UNKNOWN   |
| 6  | 26156758  | C                                                   | T   | IH-108083-T1-1-D1-1 | 0.47  | 466HIST1H1E  | p.A47V                      | non_synonymous_codon | UNKNOWN   |
| 6  | 108985226 | C                                                   | G   | IH-108083-T1-1-D1-1 | 0.11  | 1161FOXO3    | p.P397R                     | non_synonymous_codon | UNKNOWN   |
| 12 | 122018761 | T                                                   | C   | IH-108083-T1-1-D1-1 | 0.46  | 854KDM2B     | p.H19R                      | non_synonymous_codon | UNKNOWN   |
| 19 | 45860626  | G                                                   | C   | IH-108083-T1-1-D1-1 | 0.49  | 561ERCC2     | p.L461V                     | non_synonymous_codon | UNKNOWN   |
| 19 | 18272777  | A                                                   | T   | IH-108083-T1-1-D1-1 | 0.47  | 479PIK3R2    | p.S273C                     | non_synonymous_codon | UNKNOWN   |
| 20 | 30822339  | G                                                   | A   | IH-108083-T1-1-D1-1 | 0.48  | 840POFUT1    | p.D348N                     | non_synonymous_codon | UNKNOWN   |
| 19 | 45855507  | G                                                   | C   | IH-108083-T1-1-D1-1 | 0.45  | 748ERCC2     | p.A717G                     | non_synonymous_codon | UNKNOWN   |
| 4  | 187510258 | C                                                   | T   | IH-108083-T1-1-D1-1 | 0.47  | 875FAT1      | p.A4419T                    | non_synonymous_codon | UNKNOWN   |
| 9  | 135772998 | CTG                                                 | C   | IH-108083-T1-1-D1-1 | 0.08  | 327TSC1      | p.?                         | splice_site_variant  | UNKNOWN   |
| 1  | 160323977 | A                                                   | G   | IH-108084-T1-1-D1-1 | 0.46  | 467NCSTN     | p.N417Y                     | non_synonymous_codon | UNKNOWN   |
| 18 | 33754519  | C                                                   | T   | IH-108084-T1-1-D1-1 | 0.45  | 230ELP2      | p.A799V                     | non_synonymous_codon | UNKNOWN   |
| 5  | 149495360 | G                                                   | A   | IH-108084-T1-1-D1-1 | 0.46  | 324PDGFRB    | p.A1096V                    | non_synonymous_codon | UNKNOWN   |
| 4  | 55964925  | G                                                   | A   | IH-108084-T1-1-D1-1 | 0.44  | 404KOR       | p.T771M                     | non_synonymous_codon | UNKNOWN   |
| X  | 129139262 | C                                                   | T   | IH-108084-T1-1-D1-1 | 1     | 107BCORL1    | p.R19W                      | non_synonymous_codon | UNKNOWN   |
| 3  | 37092047  | G                                                   | A   | IH-108084-T1-1-D1-1 | 0.47  | 366MLH1      | p.R725H                     | non_synonymous_codon | UNKNOWN   |
| 8  | 41834732  | C                                                   | T   | IH-108084-T1-1-D1-1 | 0.53  | 567KAT6A     | p.R386Q                     | non_synonymous_codon | UNKNOWN   |
| 13 | 48934173  | G                                                   | T   | IH-108084-T1-1-D1-1 | 0.44  | 861RB1       | p.D210Y                     | non_synonymous_codon | UNKNOWN   |
| 14 | 95557551  | T                                                   | C   | IH-108084-T1-1-D1-1 | 0.5   | 605DICER1    | p.R1839Q                    | non_synonymous_codon | UNKNOWN   |
| 19 | 13054564  | AGCAGAGGCTTAAGGAGGAGGAAGAAACAAGAAACGCAAGAGGAGGAGGAG | A   | IH-108084-T1-1-D1-1 | 0.102 | 410CALR      | p.L367fs*46                 | frameshift_variant   | ONCOGENIC |
| 9  | 5073770   | G                                                   | T   | IH-108085-T1-1-D1-1 | 0.35  | 231JAK2      | p.V617F                     | non_synonymous_codon | ONCOGENIC |
| 7  | 151945330 | G                                                   | T   | IH-108085-T1-1-D1-1 | 0.058 | 521KMT2C     | p.S730Y                     | non_synonymous_codon | LIKELY    |
| 8  | 128750527 | T                                                   | C   | IH-108085-T1-1-D1-1 | 0.51  | 821MYC       | p.F22L                      | non_synonymous_codon | LIKELY    |
| 1  | 160323977 | A                                                   | T   | IH-108085-T1-1-D1-1 | 0.41  | 472NCSTN     | p.N417Y                     | non_synonymous_codon | UNKNOWN   |
| 20 | 31022592  | C                                                   | T   | IH-108085-T1-1-D1-1 | 0.076 | 277ASXL1     | p.R693*                     | stop_gained          | ONCOGENIC |

|    |           |                           |                                            |                      |       |              |                                |                      |           |
|----|-----------|---------------------------|--------------------------------------------|----------------------|-------|--------------|--------------------------------|----------------------|-----------|
| 17 | 30323836  | A                         | G                                          | I-H-108085-T1-1-D1-1 | 0.06  | 184SUZ12     | p.D805G                        | non_synonymous_codon | UNKNOWN   |
| 7  | 41729843  | C                         | T                                          | I-H-108085-T1-1-D1-1 | 0.49  | 528INHBA     | p.R229Q                        | non_synonymous_codon | UNKNOWN   |
| 10 | 98182398  | T                         | A                                          | I-H-108085-T1-1-D1-1 | 0.43  | 532TLL2      | p.H242L                        | non_synonymous_codon | UNKNOWN   |
| 14 | 38061077  | G                         | T                                          | I-H-108085-T1-1-D1-1 | 0.67  | 186FOXA1     | p.S304R                        | non_synonymous_codon | UNKNOWN   |
| 17 | 38499083  | C                         | T                                          | I-H-108085-T1-1-D1-1 | 0.49  | 520RARA      | p.P43S                         | non_synonymous_codon | UNKNOWN   |
| 12 | 121880447 | CCTT                      | C                                          | I-H-108085-T1-1-D1-1 | 0.36  | 962KDM2B     | p.K932delK                     | inframe_codon_loss   | UNKNOWN   |
| 19 | 15350575  | TCTC                      | C                                          | I-H-108085-T1-1-D1-1 | 0.367 | 537BRD4      | p.E113delE                     | inframe_codon_loss   | UNKNOWN   |
| 9  | 5073770   | G                         | T                                          | I-H-108086-T1-1-D1-1 | 0.34  | 425JAK2      | p.V617F                        | non_synonymous_codon | ONCOGENIC |
| 1  | 120478125 | A                         | C                                          | I-H-108086-T1-1-D1-1 | 0.49  | 504NOTCH2    | p.F1209V                       | non_synonymous_codon | UNKNOWN   |
| 12 | 4488595   | G                         | T                                          | I-H-108086-T1-1-D1-1 | 0.52  | 828FGF23     | p.H52N                         | non_synonymous_codon | UNKNOWN   |
| 6  | 15513567  | G                         | A                                          | I-H-108086-T1-1-D1-1 | 0.5   | 692JARID2    | p.G1122R                       | non_synonymous_codon | UNKNOWN   |
| 20 | 36026209  | C                         | T                                          | I-H-108086-T1-1-D1-1 | 0.49  | 1745SRC      | p.R271W                        | non_synonymous_codon | UNKNOWN   |
| 8  | 37555584  | T                         | TCGCACCTCGGC GGCTCCAGCTGCCACCTGCAGCGCGCCGA | I-H-108086-T1-1-D1-1 | 0.113 | 2228ZNF703   | p.A401_H402ins PTHLGGSSCST CSA | inframe_codon_gain   | UNKNOWN   |
| 9  | 5073770   | G                         | T                                          | I-H-108087-T1-1-D1-1 | 0.38  | 351JAK2      | p.V617F                        | non_synonymous_codon | ONCOGENIC |
| 5  | 35876182  | A                         | G                                          | I-H-108087-T1-1-D1-1 | 0.48  | 441IL7R      | p.Q325R                        | non_synonymous_codon | UNKNOWN   |
| 6  | 26056310  | G                         | C                                          | I-H-108087-T1-1-D1-1 | 0.46  | 1301HIST1H1C | p.A116G                        | non_synonymous_codon | UNKNOWN   |
| 7  | 82595427  | T                         | C                                          | I-H-108087-T1-1-D1-1 | 0.46  | 1402PCLO     | p.K1228R                       | non_synonymous_codon | UNKNOWN   |
| 19 | 19256794  | G                         | T                                          | I-H-108087-T1-1-D1-1 | 0.48  | 319MEF2B     | p.R307S                        | non_synonymous_codon | UNKNOWN   |
| X  | 53432009  | G                         | A                                          | I-H-108087-T1-1-D1-1 | 0.54  | 199SMC1A     | p.R711W                        | non_synonymous_codon | LIKELY    |
| 7  | 151945217 | ACT                       | A                                          | I-H-108087-T1-1-D1-1 | 0.038 | 1007KMT2C    | p.E767fs*28                    | frameshift_variant   | UNKNOWN   |
| 7  | 151962167 | AC                        | A                                          | I-H-108087-T1-1-D1-1 | 0.056 | 753KMT2C     | p.R380fs*25                    | frameshift_variant   | UNKNOWN   |
| 7  | 151945330 | G                         | T                                          | I-H-108088-T1-1-D1-1 | 0.051 | 779KMT2C     | p.S730Y                        | non_synonymous_codon | LIKELY    |
| 6  | 108985226 | C                         | G                                          | I-H-108088-T1-1-D1-1 | 0.089 | 1123FOXO3    | p.P397R                        | non_synonymous_codon | UNKNOWN   |
| 7  | 148512132 | C                         | G                                          | I-H-108088-T1-1-D1-1 | 0.1   | 147EZH2      | p.?                            | splice_site_variant  | LIKELY    |
| 6  | 117631301 | C                         | T                                          | I-H-108088-T1-1-D1-1 | 0.48  | 472ROS1      | p.R2126Q                       | non_synonymous_codon | UNKNOWN   |
| 6  | 26234797  | T                         | C                                          | I-H-108088-T1-1-D1-1 | 0.47  | 830HIST1H1D  | p.K122R                        | non_synonymous_codon | UNKNOWN   |
| 5  | 131945093 | G                         | A                                          | I-H-108088-T1-1-D1-1 | 0.51  | 294RAD50     | p.?                            | splice_site_variant  | UNKNOWN   |
| 16 | 2983334   | G                         | A                                          | I-H-108088-T1-1-D1-1 | 0.53  | 810FLYWCH1   | p.D333N                        | non_synonymous_codon | UNKNOWN   |
| 11 | 76253389  | C                         | G                                          | I-H-108088-T1-1-D1-1 | 0.43  | 476C11orf30  | p.A896G                        | non_synonymous_codon | UNKNOWN   |
| 17 | 78935270  | G                         | A                                          | I-H-108088-T1-1-D1-1 | 0.5   | 640RPTOR     | p.V1228M                       | non_synonymous_codon | UNKNOWN   |
| 1  | 160325722 | G                         | A                                          | I-H-108088-T1-1-D1-1 | 0.44  | 391NCSTN     | p.D509N                        | non_synonymous_codon | UNKNOWN   |
| 2  | 242681923 | G                         | A                                          | I-H-108088-T1-1-D1-1 | 0.48  | 692D2HGDH    | p.V142I                        | non_synonymous_codon | UNKNOWN   |
| 19 | 13054627  | A                         | ATTGTC                                     | I-H-108088-T1-1-D1-1 | 0.144 | 445CALR      | p.K385fs*47                    | frameshift_variant   | LIKELY    |
| 19 | 33792731  | G                         | GGCGGGT                                    | I-H-108088-T1-1-D1-1 | 0.227 | 22CEBPA      | p.P196_P197ins HP              | inframe_codon_gain   | UNKNOWN   |
| 16 | 2134981   | CCTT                      | C                                          | I-H-108088-T1-1-D1-1 | 0.443 | 751TSC2      | p.F1510delF                    | inframe_codon_loss   | UNKNOWN   |
| 20 | 31022683  | TAGGAGAG                  | T                                          | I-H-108088-T1-1-D1-1 | 0.071 | 407ASXL1     | p.R718fs*5                     | frameshift_variant   | LIKELY    |
| 21 | 36259322  | G                         | GC                                         | I-H-108088-T1-1-D1-1 | 0.082 | 960RUNX1     | p.P57fs*81                     | frameshift_variant   | LIKELY    |
| 17 | 70120019  | G                         | GCGC                                       | I-H-108088-T1-1-D1-1 | 0.279 | 172SOX9      | p.P346_Q347ins P               | inframe_codon_gain   | UNKNOWN   |
| 7  | 151882672 | C                         | A                                          | I-H-108089-T1-1-D1-1 | 0.13  | 563KMT2C     | p.A1685S                       | non_synonymous_codon | LIKELY    |
| 19 | 10472202  | C                         | G                                          | I-H-108089-T1-1-D1-1 | 0.24  | 1522TYK2     | p.V678L                        | non_synonymous_codon | UNKNOWN   |
| 20 | 31017239  | G                         | A                                          | I-H-108089-T1-1-D1-1 | 0.39  | 328ASXL1     | p.?                            | splice_site_variant  | LIKELY    |
| 13 | 41240039  | C                         | G                                          | I-H-108089-T1-1-D1-1 | 0.32  | 25FOXO1      | p.G104A                        | non_synonymous_codon | UNKNOWN   |
| 2  | 25990569  | C                         | T                                          | I-H-108089-T1-1-D1-1 | 0.5   | 877ASXL2     | p.G220R                        | non_synonymous_codon | UNKNOWN   |
| 4  | 106197317 | A                         | G                                          | I-H-108089-T1-1-D1-1 | 0.41  | 380TET2      | p.T1884A                       | non_synonymous_codon | ONCOGENIC |
| 17 | 74732935  | CGGCGGCTGTGGTGTGAGTCCGGGG | C                                          | I-H-108089-T1-1-D1-1 | 0.286 | 367SRSF2     | p.P95_R102delP PDSHHSR         | inframe_codon_loss   | ONCOGENIC |
| 9  | 5073770   | G                         | T                                          | I-H-108090-T1-1-D1-1 | 0.57  | 421JAK2      | p.V617F                        | non_synonymous_codon | ONCOGENIC |
| 20 | 57484421  | G                         | A                                          | I-H-108090-T1-1-D1-1 | 0.42  | 782GNAS      | p.R202H                        | non_synonymous_codon | ONCOGENIC |
| 17 | 17118598  | C                         | T                                          | I-H-108090-T1-1-D1-1 | 0.51  | 340FLCN      | p.A445T                        | non_synonymous_codon | UNKNOWN   |
| 2  | 209113112 | C                         | T                                          | I-H-108090-T1-1-D1-1 | 0.42  | 240DH1       | p.R132H                        | non_synonymous_codon | ONCOGENIC |
| 8  | 27645464  | A                         | C                                          | I-H-108090-T1-1-D1-1 | 0.51  | 383ESCO2     | p.Q359P                        | non_synonymous_codon | UNKNOWN   |
| 19 | 18278023  | C                         | T                                          | I-H-108090-T1-1-D1-1 | 0.41  | 417PIK3R2    | p.A548V                        | non_synonymous_codon | UNKNOWN   |
| 2  | 96810790  | C                         | A                                          | I-H-108090-T1-1-D1-1 | 0.55  | 198DUSP2     | p.R102W                        | non_synonymous_codon | UNKNOWN   |
| 7  | 80290500  | T                         | C                                          | I-H-108090-T1-1-D1-1 | 0.53  | 306CD36      | p.F135L                        | non_synonymous_codon | UNKNOWN   |
| 17 | 74732935  | CGGCGGCTGTGGTGTGAGTCCGGGG | C                                          | I-H-108090-T1-1-D1-1 | 0.339 | 425SRSF2     | p.P95_R102delP PDSHHSR         | inframe_codon_loss   | ONCOGENIC |
| 22 | 29091856  | AG                        | A                                          | I-H-108090-T1-1-D1-1 | 0.404 | 218CHEK2     | p.T410fs*15                    | frameshift_variant   | UNKNOWN   |

**Table S2**

|                                                                      | MAC (N=18)  | RIC (N=83)  | p value* |
|----------------------------------------------------------------------|-------------|-------------|----------|
| <b>Age at transplant</b>                                             |             |             | 0.8639   |
| N                                                                    | 18          | 83          |          |
| Mean (SD)                                                            | 58.0 (7.7)  | 57.7 (7.8)  |          |
| Median                                                               | 59.3        | 59          |          |
| Range                                                                | (38.3-65.5) | (30.0-73.4) |          |
| <b>gender</b>                                                        |             |             | 0.2931   |
| Male                                                                 | 13 (72.2%)  | 47 (56.6%)  |          |
| <b>cytogenetic risk</b>                                              |             |             | 0.2124   |
| Missing                                                              | 3           | 12          |          |
| favorable                                                            | 13 (86.7%)  | 48 (67.6%)  |          |
| unfavorable                                                          | 2 (13.3%)   | 23 (32.4%)  |          |
| <b>Diagnosis Group</b>                                               |             |             | 0.8019   |
| PMF                                                                  | 10 (55.6%)  | 52 (62.7%)  |          |
| Post ET MF                                                           | 4 (22.2%)   | 16 (19.3%)  |          |
| Post PV MF                                                           | 4 (22.2%)   | 14 (16.9%)  |          |
| MPN-U                                                                | 0 (0.0%)    | 1 (1.2%)    |          |
| <b>DIPSS</b>                                                         |             |             | 0.4697   |
| Low Risk                                                             | 1 (5.6%)    | 8 (9.6%)    |          |
| Int-1                                                                | 4 (22.2%)   | 32 (38.6%)  |          |
| Int-2                                                                | 10 (55.6%)  | 31 (37.3%)  |          |
| High Risk                                                            | 3 (16.7%)   | 12 (14.5%)  |          |
| <b>Donor Type</b>                                                    |             |             | 0.0084   |
| MRD                                                                  | 7 (38.9%)   | 39 (47.0%)  |          |
| MUD                                                                  | 8 (44.4%)   | 44 (53.0%)  |          |
| Mismatch                                                             | 3 (16.7%)   | 0 (0.0%)    |          |
| <b>Time from Diagnosis to Transplant (years)</b>                     |             |             | 0.895    |
| Mean (SD)                                                            | 3.5 (5.0)   | 3.4 (4.3)   |          |
| Median                                                               | 1.4         | 2.1         |          |
| Range                                                                | (0.2-18.0)  | (0.1-28.4)  |          |
| <b>3 or more somatic mutations</b>                                   |             |             | 0.3976   |
| Yes                                                                  | 7 (38.9%)   | 23 (27.7%)  |          |
| <b>HMR</b>                                                           |             |             | 0.7948   |
| Yes                                                                  | 6 (33.3%)   | 31 (37.3%)  |          |
| <b>MPN Triple Negative (no for JAK2, MPL and CALR)</b>               |             |             | 0.5336   |
| Yes                                                                  | 5 (27.8%)   | 17 (20.5%)  |          |
| <b>MPN drive mutation</b>                                            |             |             | 0.9032   |
| Had two mutations (JAK2&CALR or JAK2&MPL)                            | 1 (5.6%)    | 4 (4.8%)    |          |
| Only had JAK2                                                        | 9 (50.0%)   | 43 (51.8%)  |          |
| Only had CALR                                                        | 3 (16.7%)   | 19 (22.9%)  |          |
| Triple negative                                                      | 5 (27.8%)   | 17 (20.5%)  |          |
| *: Two sample t-test or Fisher's exact test was used when applicable |             |             |          |

**Table S3**

| <b>Effect</b>               | <b>Level</b> | <b>NRM N/Total N</b> | <b>HR (95% CI)</b> | <b>P value</b> |
|-----------------------------|--------------|----------------------|--------------------|----------------|
| <b>Conditioning Regimen</b> | MAC          | 1/18                 | Reference          | 0.0024         |
|                             | RIC          | 36/83                | 10.59 (1.49-75.46) |                |
| <b>U2AF1_cat</b>            | No           | 29/91                | Reference          | 0.0036         |
|                             | Yes          | 8/10                 | 3.25 (1.60-6.60)   |                |
| <b>IDH2_cat</b>             | No           | 31/93                | Reference          | 0.0277         |
|                             | Yes          | 6/8                  | 2.72 (1.24-5.98)   |                |
| <b>DNMT3A_cat</b>           | No           | 33/96                | Reference          | 0.0311         |
|                             | Yes          | 4/5                  | 3.16 (1.27-7.84)   |                |



**Table S4**

| <b>Effect</b>                            | <b>Level</b>                              | <b>HR (95% CI)</b> | <b>P value</b> |
|------------------------------------------|-------------------------------------------|--------------------|----------------|
| <b>Age at transplant</b>                 | 50 - 65 vs. < 50                          | 1.27 (0.50,3.25)   | 0.8763         |
|                                          | > 65 vs. < 50                             | 1.29 (0.41,4.05)   |                |
| <b>gender</b>                            | F vs. M                                   | 1.10 (0.61,1.98)   | 0.7434         |
| <b>Cytogenetic risk</b>                  | unfavorable vs. favorable                 | 1.88 (0.98,3.61)   | 0.1007         |
|                                          | NA vs. favorable                          | 1.85 (0.83,4.15)   |                |
| <b>DIPSS</b>                             | High Risk vs. Low Risk                    | 1.34 (0.40,4.46)   | 0.7146         |
|                                          | Int-1 vs. Low Risk                        | 1.34 (0.45,3.97)   |                |
|                                          | Int-2 vs. Low Risk                        | 0.94 (0.31,2.81)   |                |
| <b>Spleen status</b>                     | Splenectomy vs. No splenomegaly           | 1.61 (0.57,4.53)   | 0.5971         |
|                                          | Splenomegaly vs. No splenomegaly          | 1.39 (0.66,2.93)   |                |
| <b>Conditioning intensity</b>            | RIC vs. MAC                               | 2.96 (1.06,8.26)   | 0.03           |
| <b>Time from diagnosis to transplant</b> | >2 years vs. <= 2 years                   | 0.95 (0.53,1.69)   | 0.8486         |
| <b>Primary vs secondary MF</b>           | Other dx vs. PMF                          | 0.89 (0.49,1.63)   | 0.7109         |
| <b>Donor</b>                             | Unrelated vs. Related                     | 1.72 (0.95,3.14)   | 0.072          |
| <b>Donor age</b>                         | >=50 vs. <50                              | 0.88 (0.46,1.68)   | 0.6896         |
| <b>Mutations</b>                         | At least one positive vs. triple negative | 1.33 (0.62,2.85)   | 0.4626         |
| <b>HMR presence</b>                      | Yes vs. No                                | 1.47 (0.81,2.68)   | 0.2022         |
| <b>3 or more somatic mutations</b>       | Yes vs. No                                | 1.53 (0.84,2.79)   | 0.1609         |
| <b>JAK2</b>                              | Yes vs. No                                | 1.59 (0.86,2.95)   | 0.1368         |
| <b>CALR</b>                              | Yes vs. No                                | 0.61 (0.27,1.35)   | 0.2169         |
| <b>ASXL1</b>                             | Yes vs. No                                | 1.67 (0.85,3.30)   | 0.1332         |
| <b>SRSF2</b>                             | Yes vs. No                                | 0.85 (0.34,2.16)   | 0.7402         |
| <b>KMT2C</b>                             | Yes vs. No                                | 1.23 (0.52,2.91)   | 0.6313         |
| <b>U2AF1</b>                             | Yes vs. No                                | 2.37 (1.10,5.08)   | 0.0226         |
| <b>TET2</b>                              | Yes vs. No                                | 1.49 (0.59,3.77)   | 0.3991         |
| <b>IDH2</b>                              | Yes vs. No                                | 1.99 (0.84,4.70)   | 0.1088         |
| <b>DNMT3A</b>                            | Yes vs. No                                | 4.02 (1.56,10.35)  | 0.0018         |
| <b>MIPSS-70</b>                          | High Risk vs. Intermediate/low risk       | 1.30 (0.66,2.55)   | 0.4496         |

**Table S5**

| <b>Case</b> | <b>Months Post-Transplant</b> | <b>%Donor</b> | <b>%Host</b> | <b>Detection of JAK2V617F mutation</b> |
|-------------|-------------------------------|---------------|--------------|----------------------------------------|
| PT1         | 1                             | 84            | 16           | -                                      |
|             | 3                             | 83            | 17           | -                                      |
|             | 5                             | 85            | 15           | -                                      |
|             | 8                             | 60            | 40           | +                                      |
| PT2         | 2                             | 100           | 0            | -                                      |
|             | 3                             | 100           | 0            | -                                      |
|             | 4                             | 100           | 0            | -                                      |
|             | 5                             | 80            | 20           | +                                      |
| PT3         | 1                             | 100           | 0            | -                                      |
|             | 3                             | 100           | 0            | -                                      |
|             | 4                             | 91            | 9            | +                                      |
| PT4         | 1                             | 100           | 0            | -                                      |
|             | 3                             | 77            | 23           | -                                      |
|             | 4                             | 75            | 25           | N/A                                    |
|             | 6                             | 52            | 48           | +                                      |
|             | 12                            | 14            | 86           | +                                      |

# Supplemental Figure 1

**A**

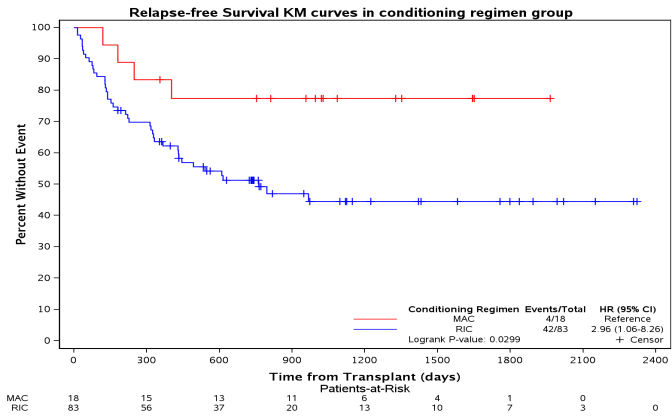

**B**

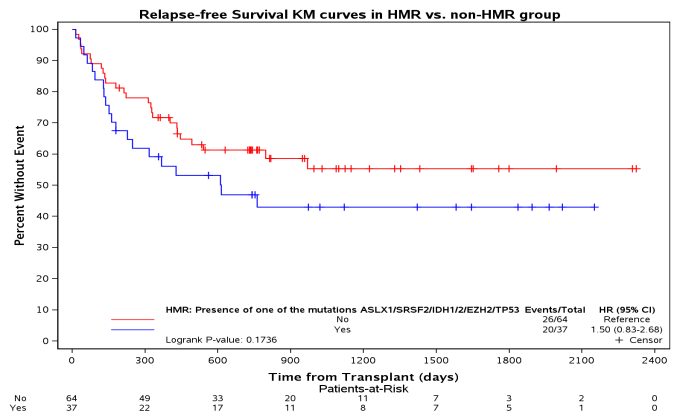

**C**

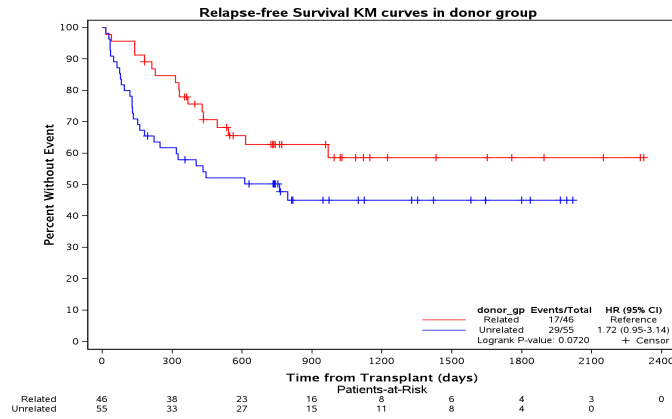

**D**

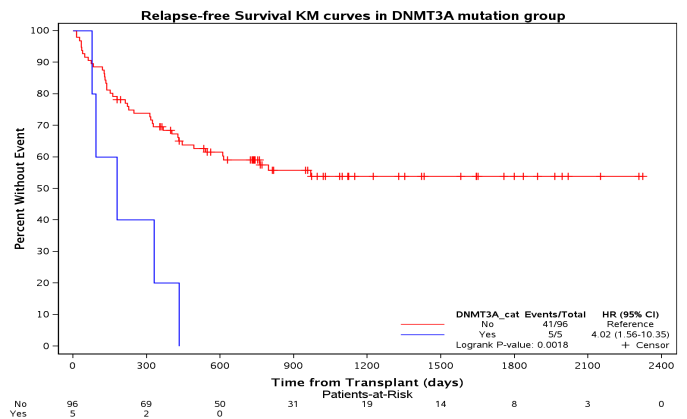

**E**

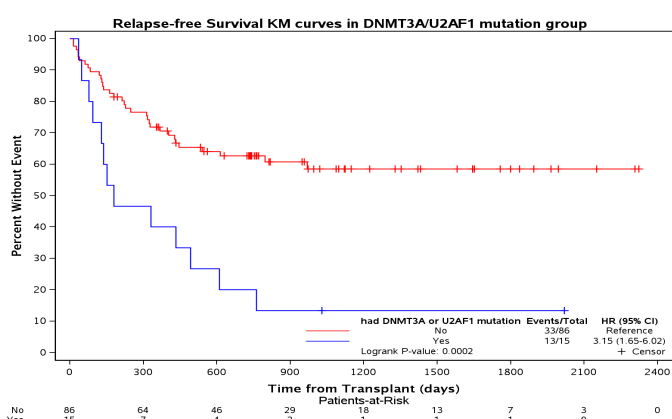

**F**

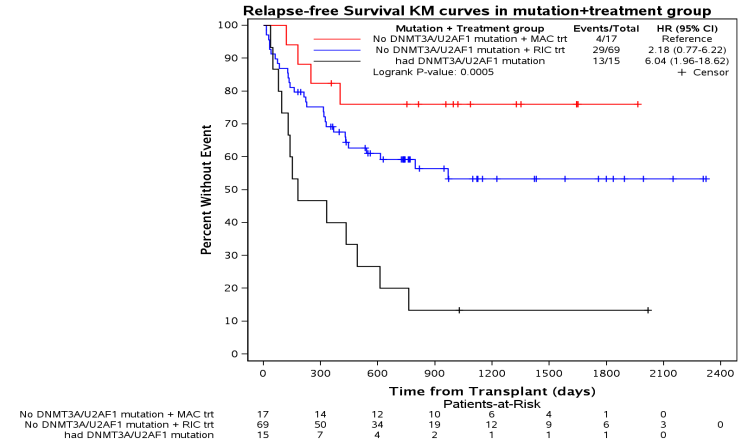

# Supplemental Figure 2

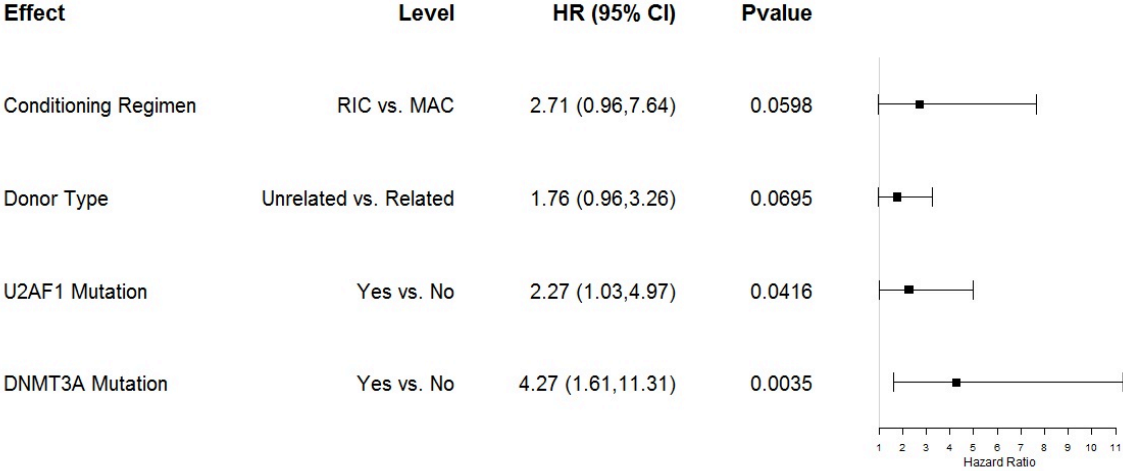

Supplement: NIHMS1059648-supplement-1.pdf [file NIHMS1059648-supplement-1.pdf]
